1 **Two Types of Cinnamoyl-CoA Reductase Function Divergently**  
2 **in Tissue Lignification, Phenylpropanoids Flux Control, and**  
3 **Inter-pathway Cross-talk with Glucosinolates as Revealed in**  
4 ***Brassica napus***

5 **Nengwen Yin,<sup>1,2,†</sup> Bo Li,<sup>1,†</sup> Xue Liu,<sup>1</sup> Ying Liang,<sup>1,2</sup> Jianping Lian,<sup>1</sup> Yufei**  
6 **Xue,<sup>1</sup> Cunmin Qu,<sup>1,2</sup> Kun Lu,<sup>1,2</sup> Lijuan Wei,<sup>1,2</sup> Rui Wang,<sup>1,2</sup> Jiana Li,<sup>1,2,\*</sup> and**  
7 **Yourong Chai<sup>1,2,\*</sup>**

8 <sup>1</sup> Chongqing Engineering Research Center for Rapeseed, College of  
9 Agronomy and Biotechnology, Southwest University, Chongqing 400715,  
10 China

11 <sup>2</sup> Engineering Research Center of South Upland Agriculture of Ministry of  
12 Education, Academy of Agricultural Sciences, Southwest University,  
13 Chongqing 400715, China

14 <sup>†</sup> These authors contributed equally to this work.

15 \* Address correspondence to [ljn1950@swu.edu.cn](mailto:ljn1950@swu.edu.cn) and  
16 [chaiyourong@163.com](mailto:chaiyourong@163.com).

17 **Email address:** nwyin80@126.com (N.Y.); lb19751022@163.com (B.L.);  
18 liu0906xue@163.com (X.L.); yliang@swu.edu.cn (Y.L.); jp\_lian@126.com  
19 (J.L.); xyf710@swu.edu.cn (Y.X.); drqacunmin@swu.edu.cn (C.Q.);  
20 drlukun@swu.edu.cn (K.L.); lijuanwei@swu.edu.cn (L.W.);  
21 Ruiwang71@163.com (R.W.); ljn1950@swu.edu.cn (J.L.);  
22 chaiyourong@163.com (Y.C.).

23 **Submission date:** 2021-04-13

24 **Number of tables and figures:** no table and 7 figures

25 **Word count:** 6932

26 **Supplementary tables and figures:** 8 Supplementary tables and 19  
27 Supplementary figures

28 **Running title:** Cinnamoyl-CoA reductases function divergently in *Brassica*

29 **Highlight:** Brassicaceae contains two types of Cinnamoyl-CoA reductase. As  
30 revealed in *Brassica napus*, they are divergently involved in lignin monomer  
31 biosynthesis, tissue lignification, phenylpropanoid flux control, and  
32 inter-pathway crosstalk with glucosinolates.

### 33 **Abstract**

34 Cinnamoyl-CoA reductase (CCR) is the entry point of lignin pathway and a  
35 crucial locus in dissection and manipulation of associated traits, but its  
36 functional dissection in Brassicaceae plants is largely lagged behind though  
37 *Arabidopsis thaliana* *CCR1* has been characterized to certain extent. Here, 16  
38 *CCR* genes are identified from *Brassica napus* and its parental species *B. rapa*  
39 and *B. oleracea*. Brassicaceae *CCR* genes are divided into *CCR1* subfamily  
40 and *CCR2* subfamily with divergent organ-specificity, yellow-seed trait  
41 participation and stresses responsiveness. *CCR1* is preferential in G- and  
42 H-lignins biosynthesis and vascular development, while *CCR2* has a deviation  
43 to S-lignin biosynthesis and interfascicular fiber development. *CCR1* has  
44 stronger effects on lignification-related development, lodging resistance,  
45 phenylpropanoid flux control and seed coat pigmentation, whereas *CCR2*  
46 controls sinapates levels. *CCR1* upregulation could delay bolting and flowering  
47 time, while *CCR2* upregulation weakens vascular system in leaf due to  
48 suppressed G lignin accumulation. Besides, *CCR1* and *CCR2* are deeply but  
49 almost oppositely linked with glucosinolates metabolism through inter-pathway  
50 crosstalk. Strangely, upregulation of both *CCR1* and *CCR2* could not enhance  
51 resistance to UV-B and *S. sclerotiorum* though *CCR2* is sharply induced by  
52 them. These results provide systemic dissection on *Brassica* *CCRs* and  
53 *CCR1-CCR2* divergence in Brassicaceae.

54 **Keywords:** *Brassica*, Cinnamoyl-CoA reductase (CCR), Functional  
55 divergence, Lignin, Sinapates, Flavonoids, Glucosinolates, Lodging,  
56 *Sclerotinia sclerotiorum*.

57

## 58 **Introduction**

59 Lignins constitute one important group of phenylpropanoids, are deposited in  
60 plant secondary cell walls, and are the second most abundant biopolymers on  
61 the planet (Huang *et al.*, 2010; Vanholme *et al.*, 2010). They perform many  
62 functions, providing structural support, giving rigidity and strength to stems to  
63 stand upright, and enabling xylems to withstand the negative pressure  
64 generated during water transport (Escamilla-Treviño *et al.*, 2010; Labeeuw *et*  
65 *al.*, 2015). In addition, lignins have been suggested to be induced upon various  
66 biotic and abiotic stresses, such as pathogen infection, insect feeding, drought,  
67 heat and wounding (Caño-Delgado *et al.*, 2003; Weng and Chapple, 2010;  
68 Chantreau *et al.*, 2014).

69 To date, engineering of lignins mainly pursues reduced lignin content or  
70 altered lignin composition to meet the demands of agro-industrial processes,  
71 such as chemical pulping, forage digestibility, and the bioethanol production  
72 from lignocellulosic biomass (Baucher *et al.*, 2003; Li *et al.*, 2008; Weng *et al.*,  
73 2010; Ko *et al.*, 2015; De Meester *et al.*, 2020). However, when altering the  
74 expression of lignin pathway genes, the metabolic flux of its neighbor  
75 pathways would be changed correspondingly (Hoffmann *et al.*, 2004; Li *et al.*,  
76 2010; Thévenin *et al.*, 2011). Furthermore, dramatic modification of lignin  
77 content or lignin composition may provoke deleterious effects on plant growth,  
78 such as dwarfism and collapsed xylem vessels, with concomitant loss of  
79 biomass and yield (Piquemal *et al.*, 1998; Ruel *et al.*, 2009; De Meester *et al.*,  
80 2020).

81 Cinnamoyl-CoA reductase (CCR) is the entry point for the lignin-specific

82 branch of the phenylpropanoid pathway and catalyzes the monolignol  
83 biosynthesis (Lacombe *et al.*, 1997; Kawasaki *et al.*, 2006). *Arabidopsis*  
84 *thaliana* possesses 11 annotated CCR homologs (Costa and Dolan, 2003), but  
85 only *AtCCR1* and *AtCCR2* encode true CCR enzyme (Lauvergeat *et al.*, 2001).  
86 *AtCCR1* is preferentially expressed in tissues undergoing lignification, while  
87 *AtCCR2* is poorly expressed during development but is strongly and transiently  
88 induced by *Xanthomonas campestris*, suggesting that *AtCCR1* might be  
89 involved in constitutive lignification whereas *AtCCR2* might be involved in  
90 resistance (Lauvergeat *et al.*, 2001). However, to date there is no functional  
91 verification of this assumption through over-expression transgenic study in *A.*  
92 *thaliana*, and the function of *CCR2* in Brassicaceae is not dissected. In  
93 monocot grasses, *CCR1* expression can be detected in various organs with a  
94 relatively high transcription level in stem (Tu *et al.*, 2010; Giordano *et al.*, 2014),  
95 thus is thought to be involved in constitutive lignification. In poplar and  
96 switchgrass, *CCR2* is expressed at very low levels in most organs, but can be  
97 significantly induced by biotic and abiotic stresses (Escamilla-Treviño *et al.*,  
98 2010). Manipulation of *CCR* (mainly through downregulation) typically results  
99 in a significant variation of lignin content and composition (Goujon *et al.*, 2003;  
100 Zhou *et al.*, 2010; Wagner *et al.*, 2013). Moreover, plants with dramatically  
101 downregulated *CCR* genes usually showed a stunted growth and delayed  
102 development (Tamasloukht *et al.*, 2011; Thévenin *et al.*, 2011; De Meester *et*  
103 *al.*, 2020), and the alternation of carbon flux between lignin and other  
104 metabolic pathways was also accompanied (van der Rest *et al.*, 2006; Dauwe  
105 *et al.*, 2007; Wagner *et al.*, 2013).

106 Lodging and diseases are fatal problems in field production of most crops.  
107 Reducing plant height has been proven to be a useful strategy for improving  
108 lodging resistance, but dwarfism will reduce canopy photosynthetic capacity  
109 and yield (Zhang *et al.*, 2001; Acreche and Slafer, 2011; Peng *et al.*, 2014).  
110 Increasing stem strength would be a very promising strategy for breeding  
111 crops with high lodging resistance (Ma, 2009). Moreover, lignin is a physical

112 barrier which can restrict pathogens to the infection site and confer disease  
113 resistance in plants (Lee *et al.*, 2019). There are few reports at the molecular  
114 level to address how the regulation of lignin biosynthesis affects crop lodging  
115 and pathogen resistance via gene manipulation. In wheat, accumulation of  
116 lignin is closely related to lodging resistance, and wheat culms with higher  
117 lignin content could have a better lodging resistance (Peng *et al.*, 2014).  
118 Regarding defense, the CCR-like gene *SnI6* is required for NH1-mediated  
119 resistance to bacterial pathogen *Xanthomonas oryzae* pv. *Oryzae* in rice (Bart  
120 *et al.*, 2010). However, there is few reports on overexpressing CCR in  
121 enhancing lodging or disease resistance with molecular breeding values in  
122 crops.

123 *Brassica*, a relative genus of model plant *A. thaliana*, is of great importance  
124 since it contains various important oilseed, vegetable and ornamental crops.  
125 Unfortunately, *Brassica* crops especially rapeseed (*B. napus*) frequently suffer  
126 from some detrimental stresses such as lodging (Liu *et al.*, 2010; Peng *et al.*,  
127 2014) and stem rot disease caused by *Sclerotinia sclerotiorum* with serious  
128 yield penalty and quality deterioration (del Río *et al.*, 2007; Ding *et al.*, 2015).  
129 In rapeseed, lodging could lead to 20%–46% yield loss and about four percent  
130 points of oil content reduction, and limits the efficiency of mechanical harvest  
131 (Pan *et al.*, 2012; Kendall *et al.*, 2017; Berry, 2018). There is little knowledge at  
132 present concerning the functional genes involved in lignin biosynthesis in  
133 rapeseed or even in *Brassica* species. Comprehensive characterization of the  
134 lignin biosynthesis in rapeseed will enable us to manipulate the lignin content  
135 or composition through genetic engineering, and to strengthen the capacity for  
136 lodging and pathogen resistance.

137 In this study, the *CCR1* and *CCR2* subfamily members from *B. napus* and its  
138 parental species *B. rapa* and *B. oleracea* were isolated, their expression  
139 patterns in different organs and under various stresses were investigated, and  
140 overexpression of *BnCCR1* and *BnCCR2* was performed for deciphering their  
141 biological functions and biotechnological potentials. Our results demonstrated

142 that *BnCCR1* was mainly involved in the biosynthesis of H- and G-lignins,  
143 while *BnCCR2* showed a preference in the biosynthesis of S-lignin and in plant  
144 defense. A dramatic shift of carbon flux in phenylpropanoid pathway and a  
145 strong crosstalk effect on glucosinolate pathway was demonstrated in both  
146 *BnCCR1*- and *BnCCR2*-transgenic plants, especially for *BnCCR1*  
147 manipulation. Besides, *BnCCR1* and *BnCCR2* showed distinctly different  
148 association with flux regulation and development control, which accounted for  
149 distinct phenotypic modification in vascular system, lodging resistance, seed  
150 color, flowering time and glucosinolate profiles in corresponding  
151 overexpressors. Surprisingly and unexpectedly, both *BnCCR1*- and  
152 *BnCCR2*-overexpressors did not show increased resistance to *S. sclerotiorum*  
153 and UV-B light, implying complicated association of *CCR* and lignin pathway  
154 with disease resistance.

## 155 **Materials and methods**

### 156 **Plant Materials**

157 *B. napus*: black-seed varieties 5B and ZS10, yellow-seed variety 09L587. *B.*  
158 *rapa*: black-seed variety 09L597 and yellow-seed variety 09L600. *B. oleracea*:  
159 black seed variety 09L598 and yellow-seed variety 09L599. T1 transgenic lines  
160 together with non-transgenic wild-type (WT) ZS10 plants were grown in  
161 artificial growth room (25°C, 16-h photoperiod/20°C, 8-h dark period). Later  
162 generations of transgenic lines and all other materials were planted in field  
163 cages, with common plantation conditions. Samples were immediately frozen  
164 in liquid nitrogen and stored at -80°C for gene expression analysis,  
165 biochemical and histochemical assay, gas chromatography–mass  
166 spectrometry (GC-MS) detection and UPLC-HESI-MS/MS analysis. Mature  
167 seeds, stems and roots (about 65 DAP) were harvested for agronomic traits  
168 investigation and biochemical analysis.

### 169 **Southern hybridization analysis**

170 Total genomic DNA was extracted from leaves of the 3 *Brassica* species using  
171 a standard cetyltrimethylammonium bromide protocol (Porebski *et al.*, 1997). It

172 was digested with restriction enzymes *DraI*, *EcoRI*, *EcoRV*, *HindIII* and *XbaI*  
173 (70 µg for each enzyme) respectively, and separated on a 0.8% (w/v) agarose  
174 gel. Following electrophoresis, DNA was transferred to a positively charged  
175 nylon membranes (Roche, Switzerland) using established protocols. The  
176 *Brassica CCR1*- and *CCR2*-specific probes were amplified by PCR with primer  
177 pairs FCCR1C1+RCCR1 and FBCCR2I+RBCCR2I respectively, and labelled  
178 using digoxigenin (DIG) Probe Synthesis Kit (Roche, Switzerland), with an  
179 annealing temperature of 61°C and extension time of 1 min. Sequences of all  
180 primers are provided in [Supplementary Table S8](#). Hybridizations with the  
181 probes were performed at 43°C overnight, with chemiluminescent detection  
182 using DIG Luminescent Detection Kit (Roche, Switzerland).

### 183 **Detection of Transcription Levels**

184 Total RNA of each sample was extracted using EASYspin Kit (Biomed, China)  
185 and RNAPrep pure plant kit (TIANGEN, China), and treated with DNase I to  
186 eliminate contaminated gDNA. Equal quantities of RNA (1µg) were adopted for  
187 the synthesis of total cDNA using the PrimeScript<sup>TM</sup> RT reagent kit with gDNA  
188 Eraser (TaKaRa Dalian, China). The transcript levels of *CCR1*, *CCR2* and  
189 other target genes were detected using both quantitative real-time PCR  
190 (qRT-PCR) and semi-quantitative RT-PCR (sRT-PCR) as described previously  
191 ([Zhao et al., 2007b](#)). The *25SrRNA* primer pair was used as an internal control  
192 in qRT-PCR. A 25-fold dilution series of original reverse-transcription products  
193 was used for qRT-PCR using SsoAdvaned<sup>TM</sup> Universal SYBR Green Supermix  
194 (BioRad, USA) on CFX96<sup>TM</sup> Real-Time System (BioRad, USA). Conditions for  
195 qRT-PCR were as follows: 95°C for 2 min; 40 cycles of amplification with 95°C  
196 for 30 s and 62°C for 30 s. A melting curve was obtained after amplification by  
197 heating products from 60 to 95°C. Transcript levels were determined based on  
198 changes in Cq values relative to the internal control. Results were analyzed  
199 using the CFX Manager<sup>TM</sup> 3.0 software (Bio-Rad, USA). Conditions for  
200 sRT-PCR on Veriti Thermal Cycler (ABI, USA) were as follows: 94°C for 2 min;  
201 31 cycles of amplification with 94°C for 0.5 min, 60-64°C for 0.5 min and 72°C  
202 for 1 min; followed by 72°C for 10 min. The *26SrRNA* primer pair was used as  
203 an external control in sRT-PCR. Sequences of all primers for qRT-PCR and  
204 sRT-PCR are listed in [Supplementary Table S8](#).

## 205 **Rapeseed Genetic Transformation and Screening**

206 A modified *Agrobacterium*-mediated transformation protocol according to  
207 ([Cardoza and Stewart, 2003](#)) was used to transform “double low” (low erucic  
208 acid and low glucosinolates) rapeseed commercial cultivar Zhongshuang 10  
209 (ZS10) with overexpression vectors pCD-*BnCCR1-2ox* and pCD-*BnCCR2-4ox*,  
210 using hypocotyl segments as explants ([Fu et al., 2017](#)). The regenerated  
211 plants were identified first by leaf  $\beta$ -glucuronidase (GUS) staining and leaf  
212 Basta-resistance test (200 ppm), then by Taq-PCR detection of target genes  
213 (as those for engineering strains verification) and the selectable and  
214 screenable marker gene *BAR* (primer pair FBar+RBar, annealed at 58°C,  
215 extension for 30 s). The T1 transgenic plants were grown in artificial growth  
216 room and were selfed. Representative T2 and T3 transgenic lines and WT  
217 were grown in field cages, and positive plants of above identifications were  
218 subjected to traits investigation and further studies.

## 219 **Agronomic Traits Investigation**

220 The area and length of the 4th or the 5th leaves which was fully expanded  
221 were surveyed during vegetative stage, and the length and width of the  
222 petioles of these leaves were measured at the same time. The primary branch  
223 numbers, middle stem diameter and stem strength at reproductive stage, and  
224 the plant traits at harvest stage, were recorded and measured. The weight of  
225 1000 seeds and yield per plant were measured after the harvested seeds were  
226 dry. Stem strength determination: Freshly collected middle stem segments  
227 were placed horizontally, and the force exerted to break the stem was recorded  
228 with a universal force testing device (model DC-KZ300, Sichuan, China) to  
229 determine the stems rigidity, which was normalized with the stem's length and  
230 diameter.

## 231 **Quantification of Insoluble Condensed Tannins of Seed Coat**

232 The modified method for quantification of insoluble condensed tannins was



233 according to (Auger *et al.*, 2010) and (Naczek *et al.*, 2000). The oven-dried seed  
234 coat was milled to fine powder using a microball mill, and extracted with  
235 hexane for 12 h using a Soxhlet apparatus and then dried at room temperature.  
236 10 mg sample of seed coat powder was extracted with the extraction solution  
237 of three milliliters of butanol-HCl (95:5; v/v), 300  $\mu$ L methanol and 100  $\mu$ L of 2%  
238 ferric ammonium sulfate (w/v) in 2 N HCl. The tubes were heated for 3 h at  
239 95°C in a water bath, centrifuged after cooling, and extracted again with the  
240 same extraction solution for 1 h. The absorbance of the pooled supernatant  
241 was measured at 550 nm against a reagent-only blank using UV-VIS  
242 spectrophotometer (UV-5100B, Shanghai, China). A calibration curve was  
243 prepared using procyanidin with amounts ranging from 0 to 200  $\mu$ g/mL.

#### 244 **Histochemical Staining, Autofluorescence and Anatomical Studies**

245 Cross sections were obtained by using a frozen section machine (Leica  
246 CM1850, Germany). Fresh petioles at vegetative stage, fresh stems and roots  
247 of the plants at reproductive stage, fresh mature silique coat and dry mature  
248 seeds coat were cut into slices of 60, 60, 60, 60 and 5  $\mu$ m thick, respectively.  
249 Phloroglucinol-HCl staining and Mäule staining of those plant organ sections  
250 were performed as previously described (Chapple *et al.*, 1992; Chen *et al.*,  
251 2002). Stained sections were observed on a stereoscopic microscope (Nikon  
252 C-BD230, Japan; OLYMPUS SZX2-FOA, Japan) and a fluorescence  
253 microscope (Nikon ECLIPSE E600W, Japan).

#### 254 **Determination of Lignin Content and Composition**

255 Lignin content was quantified using a modified acetyl bromide soluble lignin  
256 method (Fukushima and Hatfield, 2001; Chang *et al.*, 2008), and lignin  
257 composition was determined with a modified thioacidolysis method according  
258 to previous reports (Lapierre *et al.*, 1995; Yosef and Ben-Ghedalia, 1999;  
259 Robinson and Mansfield, 2009).

#### 260 **Cell Wall Isolation**

261 Harvested stems were dried in a 70°C forced air oven for 72 h, and then  
262 were ground with a Wiley mill to pass a 40-mesh screen or with a microball mill  
263 to pass an 80-mesh screen using to meet the requirements of the subsequent  
264 extraction method. 60-70 mg samples were added into a 2 mL Sarstedt screw  
265 cap tube, adding with 1.5 mL of 80% aqueous ethanol to the dispensed ground  
266 material, and vortex thoroughly (10 min). This step was repeated for a total of  
267 three cycles, followed by centrifugation at 10,000 rpm for 10 min, and the  
268 supernatant was decanted. Add 1.5 mL of chloroform/methanol (2:1 v/v)  
269 solution to the residue, and shake the tube thoroughly to resuspend the pellet.  
270 Centrifuge at 10,000 rpm for 10 min, and decant the supernatant. Resuspend  
271 the pellet in 500 µL of acetone, and evaporate the solvent with a stream of air  
272 at 35°C until dry (If needed, dried samples can be stored at room-temperature  
273 until further processing). To initiate the removal of starch from the sample,  
274 resuspend the pellet in 1.5 mL of a 0.1 M sodium acetate buffer pH 5.0, cap the  
275 Sarstedt tubes, and heat for 30 min at 80°C in a heating block. Cool the  
276 suspension on ice, and add the following agents to the pellet: 35 µL of 0.01%  
277 sodium azide (NaN<sub>3</sub>), 35 µL amylase (from *Bacillus* species, 50 µg/mL in H<sub>2</sub>O,  
278 Sigma); 3.56 µL pullulanase (from *Bacillus acidopullulyticus*, 17.8 units,  
279 Sigma). Cap the tube, and vortex thoroughly. The suspension is incubated  
280 over night at 37°C in the shaker (Orienting the tubes horizontally aides  
281 improved mixing). After enzyme digestion, the suspension was heated at  
282 100°C for 10 min in a heating block to terminate digestion. Centrifuge at  
283 10,000 rpm for 10 min, and discard the supernatant containing solubilized  
284 starch. The remaining pellet was washed three times by adding 1.5 mL water,  
285 vortexing, centrifuging, and decanting of the washing water. For removing the  
286 water, 1.5 mL anhydrous ethanol was added to resuspend the pellet, followed  
287 by vortexing, centrifuging, decanting of the supernatant, and resuspending the  
288 pellet with 500 µL of acetone. Finally, evaporate the solvent with a stream of air  
289 at 35°C until dry. It may be necessary to break the material in the tube with a  
290 spatula for better drying. If needed, the dried samples can be stored at

291 room-temperature until further processing.

### 292 **Spectrophotometer Test of Lignin Content**

293 2 mg of prepared cell wall material was interacted with 200  $\mu$ L of freshly  
294 made acetyl bromide solution (25% v/v acetyl bromide in glacial acetic acid) in  
295 a culture tube under 50°C for 3 h with shaking at 30 min intervals during first 2  
296 h and with vortex every 15 min during the last 1 h, and the reaction was  
297 stopped on ice for 5 min. Add 800  $\mu$ L of 2 M sodium hydroxide and 140  $\mu$ L of  
298 freshly prepared 0.5 M hydroxylamine hydrochloride, and vortex the tubes.  
299 Transfer the reaction solution to a 15 mL graduated test tube with stopper, and  
300 the tubes were rinsed with glacial acetic acid to complete the transfer. Fill up  
301 the tubes exactly to the 15.0 mL mark with glacial acetic acid, cap, and invert  
302 several times to mix. The absorbance of the solutions was read at 280 nm on a  
303 Varian Cary 50 spectrophotometer. A blank was included to correct for  
304 background absorbance by the reagents. Determine the percentage of acetyl  
305 bromide soluble lignin (%ABSL) using the coefficient (23.35) with the following  
306 formula: % ABSL Calc:  $\frac{\text{abs}}{(\text{Coeff} \times 1 \text{ cm})} \times \frac{(15 \text{ ml} \times 100\%)}{\text{weight}(\text{mg})}$ , 1 cm represents the  
307 pathlength, multiplication of %ABSL with 10 results in the ug/mg cell wall unit.

### 308 **GC-MS Test of Lignin Composition**

309 Transfer approximately 5 mg of cell wall material into a screw-capped glass  
310 tube for thioacidolysis. Add 1 mL freshly made thioacidolysis reagent  
311 consisting of 2.5% boron trifluoride diethyl etherate (BF<sub>3</sub>) and 10% ethanethiol  
312 (EtSH) in dioxane solution, purge vial headspace with nitrogen gas (N<sub>2</sub>), and  
313 cap immediately. After 4 h reaction at 100°C with gentle mixing every hour, the  
314 reaction was stopped by cooling on ice for 5 min. The pH of the reaction was  
315 adjusted to 3-4 by adding 300  $\mu$ L of 0.4 M sodium bicarbonate. Add 2 mL water,  
316 200  $\mu$ L tetracosane (0.5 mg/ml ethyl acetate) and 0.8 mL of ethyl acetate, and  
317 vortex. Transfer 300  $\mu$ L of the ethyl acetate layer into a 2 mL Sarstedt tube  
318 (make sure no water is transferred), and evaporate the solvent with N<sub>2</sub>. To

319 remove excess water, 200  $\mu$ L acetone was added and evaporated twice. The  
320 finally obtained oily residue was redissolved in 500  $\mu$ L of ethyl acetate, and  
321 100  $\mu$ L of resuspended sample was added with 20  $\mu$ L of pyridine, and 100  $\mu$ L  
322 of N, O-bis(trimethylsilyl) acetamide for the TMS derivatization, and incubated  
323 for 2 h at 25°C. The GC-MS test was performed to identify and quantify the  
324 lignin monomer trimethylsilylated derivatives, as 1  $\mu$ L injection volume sample  
325 was separated with a Restek Rxi-5ms column (30 m X 0.25 mm X 0.25  $\mu$ m film  
326 thickness) under split mode, and the injector and detector temperatures were  
327 set to 250°C. Helium was the carrier gas. The following temperature gradient  
328 was used with a 30 min solvent delay and a 1.1 mL/min flow rate: Initial hold at  
329 130°C for 3 min, a 3°C/min ramp to a 250°C which was hold for 5 min, and  
330 then equilibration to the initial temperature of 130°C. Quantitation of the main  
331 lignin-derived monomers was performed after an appropriate calibration  
332 relative to the Tetracosane internal standard, and the characteristic mass  
333 spectrum ions of 299 m/z, 269 m/z and 239 m/z were representative for S, G  
334 and H trimethylsilylated derivatives respectively.

### 335 **Phenolic Profiling by UPLC-HESI-MS/MS**

#### 336 **Extraction of Soluble Metabolites**

337 Samples of stems, leaves, petioles and seeds (30 DAP) were ground under  
338 liquid nitrogen in a mortar and pestle, and freeze-dried by using a vacuum  
339 freeze drier (SCANVAC, Coolsafe 110 – 4, Denmark). 30 mg ground  
340 lyophilized stems, leaves and petiole material were extracted twice by  
341 sonication with 1.0 mL of 50% methanol plus 1.5% acetic acid for 1 h at 4°C,  
342 clarified at 15,000 $\times$ g for 10 min. The supernatants were combined and  
343 concentrated by using a vacuum concentration (SCANVAC, scan speed 32,  
344 Denmark), and redissolved in 0.5 mL of 50% methanol, filtered through a 0.22  
345  $\mu$ m nylon syringe filter. 50 mg ground lyophilized seed material was extracted  
346 as previously described ([Auger et al., 2010](#)) with a little modification. One ml of  
347 a methanol/acetone/water/TFA mixture (40:32:28:0.05, v/v/v/v) was added to

348 the seed samples, and sonicated for 1 h at 4°C. After centrifugation (15,000 ×g,  
349 5 min), the pellet was extracted further with 1 mL methanol/acetone/water/TFA  
350 mixture overnight at 4°C under agitation (200 rpm), while the supernatant was  
351 stored at -80°C. Supernatants were pooled and clarified at 15,000 ×g for 10  
352 min, then concentrated. To further remove the water, 200 µL methanol was  
353 added to the extracts two times during evaporation. The dried extracts were  
354 redissolved in 1 mL of 1% acetic acid in methanol and filtered through a 0.22  
355 µm nylon syringe filter, then stored at -80°C before analysis.

### 356 **UPLC-HESI-MS/MS Analysis**

357 UPLC was performed on Dionex Ultimate-3000 UHPLC System (Thermo  
358 Fisher Scientific, Tacoma, Washington, USA), as 5 µL samples were separated  
359 on a Waters ACQUITY UPLC BEH C18 column (1.7 µm, 2.1 mm ×150 mm).  
360 The flow rate was 0.2 mL/min, and the oven temperature was 30°C. Eluent A  
361 was 0.1% formic acid in water, and eluent B was 0.1% formic acid in  
362 acetonitrile. The following gradient was applied for stems, leaves and petiole  
363 extracts elution: 5% B for 5 min, 5% B to 95% B for 20 min, 95% B for 5 min,  
364 followed by column wash and re-equilibration. For seed metabolites elution,  
365 gradient conditions were as follows: 5% to 9% B for 5 min, 9% B to 16% B for  
366 10 min, 16% B to 50% B for 25 min, 50% B to 95% B for 15 min, 95% B for 5  
367 min, followed by column wash and re-equilibration. Mass analyses were  
368 carried out with the mass spectrometer Thermo Scientific™ Q Exactive™  
369 (Thermo Fisher Scientific, Tacoma, Washington, USA) equipped with a HESI  
370 source used in the negative ion mode. Source parameters were as following:  
371 spray voltage of 3.0 kV, sheath gas flow rate at 35 arbitrary units, auxiliary gas  
372 flow rate at 10, capillary temperature at 350°C, and aux gas heater  
373 temperature at 300°C. Nitrogen gas was used as sheath gas and auxiliary gas.  
374 Full MS/dd-MS2 were acquired from m/z 100 to m/z 1500. Thermo Xcalibur  
375 software version 3.0.63 (Thermo Fisher Scientific) was used for data collection  
376 and processing. Contents of the metabolites were expressed relative to the

377 calibration curves of available standards. Standard compounds, namely  
378 *p*-coumaric acid, caffeic acid, ferulic acid, epicatechin, quercetin, kaempferol  
379 and isorhamnetin (from PureChem-Standard Co., Ltd, Chengdu, China) as  
380 well as sinigrin, sinapic acid, coniferyl aldehyde and abscisic acid (from  
381 Sigma-Aldrich, USA) were analyzed under the same conditions described  
382 above.

### 383 **Statistical Issues**

384 Except for non-necessary cases and specially indicated situation, all  
385 experiments in this study were carried out with 3 replications, and all  
386 experimental results were statistically analyzed. Statistical significance was  
387 calculated by two-tailed Student's t test (\*P < 0.05, \*\*P < 0.01), and error bars  
388 indicate SD. One-way ANOVA followed by Duncan's multiple comparisons test  
389 was used to determine the differences. Values of P < 0.05 were considered to  
390 be statistically significant.

### 391 **Accession Numbers**

392 Sequence data of the genes and proteins involved in this article can be found  
393 in the NCBI (<http://www.ncbi.nlm.nih.gov/>) databases under the accession  
394 numbers indicated in [Supplementary Table S1](#) and [Fig. 1](#).

### 395 **Other Methods**

396 Details of the stress treatments, bioinformatic methods for this study,  
397 construction of overexpression vectors, measurement of leaf spad readings,  
398 and near-infrared reflectance spectroscopy (NIRS) measurements are  
399 provided in supplementary methods.

## 400 **Results**

### 401 **Isolation and characterization of *CCR* genes from *Brassica* species**

402 *CCR* genes were isolated from *B. napus* and its parental species *B. rapa* and *B.*  
403 *oleracea* using RACE strategy. Full-length cDNAs and corresponding gDNA

404 sequences of three, four and six *CCR1*-subfamily gene sequences were  
405 isolated from *B. rapa*, *B. oleracea* and *B. napus*, while three, three and four  
406 *CCR2*-subfamily gene sequences were isolated from *B. rapa*, *B. oleracea*,  
407 respectively. Besides, one *CCR2* pseudogene from each parental species and  
408 two *CCR2* pseudogenes from *B. napus* were also isolated ([Supplementary](#)  
409 [Table S1](#)). To determine the copy number of the *BnCCR1*, *BoCCR1*, *BrCCR1*,  
410 *BnCCR2*, *BoCCR2* and *BrCCR2* genes, Southern hybridization analysis was  
411 performed ([Supplementary Fig. S1](#)), and the numbers of the clear bands were  
412 well correlated with the cloned gene sequence numbers. [Supplementary Table](#)  
413 [S1](#) shows all identity parameters of *CCR1*-subfamily and *CCR2*-subfamily  
414 genes/pseudogenes from *B. napus* and its parental species *B. oleracea* and *B.*  
415 *rapa* in terms of our cloning work and three genome datasets (NCBI GenBank,  
416 Genoscope and BRAD). The basic features of the cDNA and gDNA sequences  
417 are displayed in [Supplementary Table S2](#), and the deduced protein features  
418 are depicted in [Supplementary Table S3](#).

419 Multiple alignments showed that the conserved NADP binding domain and  
420 the CCR-featured traditional motif (KNWYCYGK, which was believed as the  
421 catalytic site) and novel motif H<sub>202</sub>K<sub>205</sub>R<sub>253</sub> (CCR-SBM or CCR substrate  
422 binding motif) are conserved in all *Brassica* CCRs ([Lacombe et al., 1997](#); [Chao](#)  
423 [et al., 2019](#)). Therefore, it is speculated that these *Brassica* CCRs have  
424 catalytic activities. A phylogenetic tree was constructed to reveal the  
425 relationships of *Brassica* CCR1 and CCR2 proteins with CCRs from all  
426 whole-genome-sequenced species of other Brassicales species and other  
427 malvids orders ([Supplementary Fig. S2](#)). Firstly, it is clear that an early  
428 intrafamily duplication event generated the CCR1 and CCR2 groups within  
429 Brassicaceae, i.e. AtCCR1 and AtCCR2 have respective CCR1 and CCR2  
430 orthologs only within Brassicaceae family. Secondly, in Brassicaceae the  
431 CCR1 group is much more conserved than the CCR2 group, which could be  
432 reflected by the great difference in branch lengths. Thirdly, outside the

433 Brassicaceae family, other Brassicales families (e.g. Cleomaceae and  
434 Caricaceae) and other malvids orders (e.g. Malvales, Myrtales and Sapindales)  
435 have similar trends in CCR evolution (gene duplication and unequal  
436 divergence of paralogs) as revealed in Brassicaceae. However, paralog  
437 numbers (numbers of duplication events) vary distinctly among relative  
438 families and orders, and the single-copy CCR from Brassicales species *Carica*  
439 *papaya* is nearer to non-Brassicales CCRs than to other Brassicales CCRs.

#### 440 **Divergent involvement in organ-specificity and seed coat color among** 441 ***Brassica* CCR family members**

442 In all the three *Brassica* species the highest *CCR1* subfamily expression was  
443 detected in silique pericarp, while the highest *CCR2* subfamily expression  
444 varied among species (bud in *B. napus*, silique pericarp in *B. rapa*, and root in  
445 *B. oleracea*), implying faster divergence of organ-specificity in *CCR2* than in  
446 *CCR1* among species. Within each species, divergence of organ-specificity  
447 and expression intensity among *CCR* paralogs were distinct, and generally  
448 stronger divergence of organ-specificity among *CCR2* paralogs could be  
449 observed than among *CCR1* paralogs. For *CCR1* subfamily, *BnCCR1-2*,  
450 *BrCCR1-2* and *BoCCR1-1* were the dominant paralog within respective  
451 species. For *CCR2* subfamily, *BnCCR2-4*, *BrCCR2-1A* and *BoCCR2-2* were  
452 the dominant paralog within respective species ([Supplementary Figs S3-S6](#)).  
453 In all the three species, *CCR1* subfamily overall expression was distinctly  
454 lower in developing seeds especially in late-stage seeds of yellow-seed stocks  
455 than in black-seed stocks, whereas *CCR2* subfamily showed an opposite trend  
456 ([Supplementary Figs S3-S6](#)).

#### 457 **Differential responsiveness to various stresses between *BnCCR1* and** 458 ***BnCCR2* subfamilies**

459 For *BnCCR1*, its overall expression showed limited upregulations by NaCl,  
460 drought & high temperature and UV-B treatment, while kept almost constant  
461 when treated with other stresses ([Supplementary Fig. S7](#)). Under the same  
462 stresses, both the overall and the member-specific expressions of *BnCCR2*  
463 subfamily were dramatically upregulated. Its overall expression in leaves was



464 upregulated by 400.3 folds at 48 h after *S. sclerotiorum* inoculation, by 49.59  
465 folds at 80 min after UV-B treatment, by 10.75 folds at 48 h after *P. rapae*  
466 inoculation, and with slow and slight increase after high temperature & drought  
467 treatment (Supplementary Figs S7 and S8). All *BnCCR2* subfamily members  
468 could be triggered by these stresses, and *BnCCR2-4* was dominant among  
469 paralogs (Supplementary Fig. S8). Although both *BnCCR1* and *BnCCR2*  
470 subfamilies can be distinctly regulated by multiple stresses, *BnCCR1* only  
471 mildly responds to abiotic stresses, while *BnCCR2* responds sharply and  
472 intensively to both biotic and abiotic stresses, thus *BnCCR2* is speculated to  
473 play more important roles than *BnCCR1* in coping with various stresses in *B.*  
474 *napus*.

475 ***BnCCR* over-expression dramatically influenced plant morphology, but**  
476 **did not increase resistance to UV-B and *S. sclerotiorum***

477 To further uncover the function of *Brassica CCR* genes, overexpression  
478 transgenic plants were generated. *BnCCR1-2* and *BnCCR2-4* were selected  
479 for transgenic study as they are dominant members within respective  
480 subfamilies. The transgenic lines were coded as *BnCCR1-2ox* or *ox1* lines for  
481 *BnCCR1-2* overexpression, and *BnCCR2-4ox* or *ox2* lines for *BnCCR2-4*  
482 overexpression, in the following analysis. The transgenic lines were screened  
483 along with non-transgenic controls (WT) by GUS staining, Basta resistance  
484 and PCR detection (Supplementary Fig. S9). Six *BnCCR1-2ox* and seven  
485 *BnCCR2-4ox* triple-positive lines were obtained, with different over-expression  
486 levels revealed by qRT-PCR detection (Supplementary Fig. S10).

487 All *BnCCRox* plants showed a stronger morphological development than WT  
488 throughout the whole life (Fig. 2). Both *BnCCR1-2ox* and *BnCCR2-4ox* had  
489 larger and longer leaves, higher leaf chlorophyll content, larger stem diameter,  
490 wider silique, higher breaking-resistant stem strength, better lodging resistance  
491 and more siliques per plant, with distinctly stronger effects in *BnCCR1-2ox*  
492 lines than in *BnCCR2-4ox* lines (Fig. 2; Supplementary Figs S11 and S12).  
493 Phytohormone detection showed that abscisic acid (ABA) increased  
494 significantly in the leaves of *BnCCRox* lines compared with WT  
495 (Supplementary Fig. S13). The leaves of *BnCCR1-2ox* had more obvious

496 wrinkles and less leaf margin serrates than WT (Fig. 2c; Supplementary Fig.  
497 S12E). *BnCCR2-4ox* plants had a looser morphology with larger leaf angles  
498 (Fig. 2B and J), and their leaves were more easily to show bending and  
499 rollover phenomenon than WT when under strong sunlight and high  
500 temperature conditions (Supplementary Fig. S12D). On the other hand, upper  
501 stems of *BnCCR1-2ox* plants at late bolting stage were more easily to appear  
502 bending phenomenon, but this phenomenon would disappear after flowering  
503 stage (Fig. 2F-I; Supplementary Fig. S12A). Moreover, *BnCCR1-2ox* lines  
504 flowered 7-10 days later than WT on average, and this phenomenon varied  
505 among years and environments. However, *BnCCR2-4ox* plants had no  
506 significant difference in flowering time when compared with WT. Interesting  
507 phenomenon was observed on petiole-vein system, which was distinctly larger  
508 in transgenic plants than WT, but phloroglucinol-HCl staining showed that  
509 petiole-vein lignification was strengthened only in *BnCCR1-2ox* plants while  
510 was weakened in *BnCCR2-4ox* plants (Fig. 2D; Supplementary Fig. S12F, H  
511 and J). Seed yield per plant of *BnCCR1-2ox* had little difference compared with  
512 WT, but *BnCCR2-4ox* had slightly decreased seed yield (Supplementary Fig.  
513 S11L). Besides, both *BnCCR1-2ox* and *BnCCR2-4ox* plants exhibited no  
514 better resistance to *S. sclerotiorum* inoculation and UV-B treatment when  
515 compared with WT, even some transgenic lines had a little reduction in disease  
516 resistance in leaf identification (Supplementary Fig. S14A, B, E and H).

#### 517 **Yellow-seed traits generated in *BnCCRox* lines**

518 As displayed in Fig. 3A, the seed color of both *BnCCR1-2ox* and *BnCCR2-4ox*  
519 turned lighter compared with WT, and *BnCCR1-2ox* showed a stronger effect  
520 than *BnCCR2-4ox*. Microscopic investigation of the frozen sections of seed  
521 coat (Fig. 3B) and R value obtained through NIRS assay (Fig. 3E) further  
522 proved this effect. However, the thickness of the seed coat had no significant  
523 difference between *BnCCRox* and WT, which was different from traditionally  
524 bred yellow-seeded cultivars which usually had thinner seed coat than  
525 black-seeded cultivars (Qu *et al.*, 2013; Zhang *et al.*, 2013). As expected, the  
526 *BnCCR1-2ox* seed coat had an apparent reduction of condensed tannin  
527 compared with WT, e.g. ox1-5, ox1-8, ox1-12 and ox1-14 had a decrease of  
528 69%, 29%, 40% and 57% respectively (Fig. 3C and G). But unexpectedly, a

529 significant increase was found for *BnCCR2-4ox* seed coat when compared  
530 with WT, e.g. ox2-4, ox2-11, ox2-16 and ox2-25 showed an increase of 88%,  
531 300%, 158% and 83% respectively (Fig. 3C and G), implying looser  
532 condensation of the tannin structure caused by unknown mechanisms.  
533 Furthermore, all *BnCCRox* lines had a significant reduction of the  
534 thousand-seed weight, with *BnCCR1-2ox* lines reduced by 10%-20%, and  
535 *BnCCR2-4ox* lines reduced by 15%-30% (Fig. 3D). Surprisingly, the NIRS  
536 detection results showed that the total glucosinolates content of *BnCCR1-2ox*  
537 lines had a considerable increase compared with WT and a decline in  
538 *BnCCR2-4ox* lines (Fig. 3F).

### 539 ***BnCCR* over-expression greatly changed lignification phenotypes**

540 The frozen cross sections of stem displayed that both *BnCCR1-2ox* and  
541 *BnCCR2-4ox* stems had an changed shape with more concave and convex  
542 and a wider xylem parts with deeper histochemical staining (Fig. 4A-C), and  
543 some extreme *BnCCR1-2ox* lines appeared an ectopic lignin deposition as  
544 shown in Fig. 4C. Observed with higher amplification folds of the sections,  
545 *BnCCR1-2ox* showed a better developed xylem part, had more number and  
546 more concentrated vessels with deeper brown color (indicating more G-lignin  
547 unit) in Mäule staining in which G- and S-type lignin units could be stained  
548 brown and red respectively (Fig. 4F and G, early flowering stage), with brighter  
549 red phloroglucinol-HCl staining (Fig. 4H, mature stage) and brighter blue  
550 fluorescence (Fig. 4I and J, early flowering stage) as compared with WT.  
551 These indicated that *BnCCR1-2ox* stems contained higher level of lignin  
552 content compared with WT. *BnCCR2-4ox* stem sections also displayed a better  
553 developed xylem part and interfascicular fiber part. Although its vessel number  
554 and size were not obviously different from WT, there was a significant deeper  
555 red color (indicating S-lignin unit) in both Mäule staining (Fig. 4F and G) and  
556 phloroglucinol-HCl staining (Fig. 4H), especially to the interfascicular fiber cells  
557 wall, and brighter blue florescence under UV light (Fig. 4I and J) compared  
558 with WT. This result indicated that *BnCCR2-4ox* stems had higher proportion of

559 S-lignin besides with higher total lignin content. Similar enhancement trends of  
560 the lignification pattern were also found in detection results of siliques (Fig.  
561 4K-N).

562 This study also reveals that rapeseed has two types of roots: type I with  
563 higher proportion of interfascicular fibers, while type II with higher proportion of  
564 vessels (Fig. 4D and E). In *BnCCR1-2ox* and *BnCCR2-4ox* lines, both type I  
565 and type II roots displayed a better developed xylem tissues with bigger size  
566 and more concentrated vessels, and had a deeper staining by  
567 phloroglucinol-HCl method compared with WT (Fig. 4D and E). Besides, type II  
568 roots of *BnCCR1-2ox* showed a significantly better vessel development (Fig.  
569 4E) than WT and *BnCCR2-4ox*. Through comparison of the above-mentioned  
570 histochemical staining assay or fluorescence excitation assay of stems and  
571 roots, *BnCCR1-2ox* had better developed vascular bundles, while  
572 *BnCCR2-4ox* had better developed interfascicular fibers than WT (Fig. 4D, G,  
573 H and J).

574 For leaf traits, the petiole of *BnCCR1-2ox* tended to be more circular with  
575 more and better developed vascular bundles (Fig. 4O and Q). But for  
576 *BnCCR2-4ox* lines, it was smaller than WT and developed asymmetrically with  
577 fewer and less developed vascular bundles (Fig. 4O and Q), maybe this was  
578 one reason that caused *BnCCR2-4ox* leaves much easier to bend and rollover  
579 than WT when under strong sunlight and high temperature conditions.  
580 Moreover, *BnCCR1-2ox* lines had a deeper brown color in Mäule staining and  
581 had a brighter blue fluorescence under UV light than WT (Fig. 4P and Q),  
582 which indicated that *BnCCR1-2ox* petiole xylem contained higher lignin  
583 content as well as higher G-lignin proportion. The *BnCCR2-4ox* petiole  
584 sections displayed no better Mäule staining, and the blue fluorescence was  
585 significant weaker than WT (Fig. 4Q), which indicated that *BnCCR2-4ox*  
586 petiole xylem contained less lignin content which was consistent with  
587 phloroglucinol-HCl staining of leaves (Supplementary Fig. S12J).

588 **Notable changes in content and structure of lignins in *BnCCR***  
589 **over-expression lines**

590 Biochemical analysis showed that the acetyl-bromide soluble lignin content of  
591 both *BnCCR1-2ox* and *BnCCR2-4ox* was significantly increased compared to  
592 WT (Fig. 4R-T). The lignin content of stems of *BnCCR1-2ox* lines ox1-5, ox1-8,  
593 ox1-12 and ox1-14 increased by 24%, 34%, 23% and 15%, respectively (Fig.  
594 4R). For *BnCCR2-4ox* lines ox2-4, ox2-11, ox2-16 and ox2-25, their stem  
595 lignin content increased by 40%, 25%, 31% and 51%, respectively (Fig. 4R). In  
596 roots, the lignin content of ox1-5, ox1-8, ox1-12, ox1-14, ox2-4, ox2-11, ox2-16  
597 and ox2-25 increased by 0.4%, 18%, 15%, 5%, 18%, 25%, 12% and 23%  
598 compared with WT, respectively (Fig. 4S). Similar trends also happened in  
599 seed coat of *BnCCR1-2ox* lines (Fig. 4T). Similar to tannin detection result, the  
600 seed coat lignin content of the *BnCCR2-4ox* lines increased by 92%-130% (Fig.  
601 4T), implying possible decreased lignin polymerization.

602 S/G ratio, which was typically used to characterize the lignin structure,  
603 changed significantly in both stems and roots of *BnCCRox* lines. In the stems  
604 of both *BnCCR2-4ox* and WT, their lignin had higher content of S-unit than  
605 G-unit, and the S/G ratio was increased by 20.2% and 22.5% in ox2-4 and  
606 ox2-16 compared with WT (Fig. 4W). It was mainly attributed to their greater  
607 proportion of S-lignin content (Fig. 4U and W; Supplementary Fig. S15), which  
608 was in consistent with the Mäule staining results. However, in the case of the  
609 stems of *BnCCR1-2ox* lines, the G-unit, other than S-unit, served as the main  
610 lignin units, so it was contrary to *BnCCR2-4ox* and WT. Due to increased  
611 G-unit proportion, the S/G ratio in the stems of ox1-5 and ox1-12 decreased by  
612 47.3% and 24.0%, respectively, compared to WT (Fig. 4U and W;  
613 Supplementary Fig. S15). In roots, the alteration tendency of S/G ratio of ox1-5  
614 and ox2-16 was similar to that in stems, decreased to 0.22 and increased to  
615 0.78, respectively as compared with WT (0.49) (Fig. 4X).

616 Another striking change was H-lignin proportion, which generally had trace  
617 amount in dicotyledonous stems. The H-lignin content of ox1-5 and ox1-12  
618 was about four and three folds of the WT respectively, while was increased by  
619 only about 50% in ox2-4 and ox2-16 (Fig. 4U; Supplementary Fig. S15). In the

620 root of ox1-5, the H-lignin content also had an obvious increase, reaching  
621 about two folds of WT amount (7.43% of WT VS 15.59% of ox1-5) (Fig. 4V;  
622 [Supplementary Fig. S15](#)). In conclusion, the lignin structure of *B. rapus* was  
623 undoubtedly modified after the manipulation of *BnCCR* genes. However, the  
624 NIRS results indicated that cellulose and hemicellulose contents of both  
625 *BnCCR1-2ox* and *BnCCR2-4ox* lines had no significant difference when  
626 compared with WT ([Supplementary Fig. S16](#)).

### 627 **Metabolic remodeling of phenylpropanoid and glucosinolate pathways** 628 **by over-expressing *BnCCR1* and *BnCCR2***

629 The drastic alteration of seed color, seed coat condensed tannin content, lignin  
630 content, lignin structure and plant phenotypes all indicated flux change within  
631 and outside the lignin biosynthetic network in *BnCCR* overexpressors.

632 Conforming to prediction, most phenolic compounds synthesized at the  
633 downstream of CCR were apparently increased in the stems of ox1-5 and  
634 ox2-16 lines, including sinapoylhexose, sinapic acid, sinapoyl malate, ferulic  
635 acid, feruloyl malate, *p*-coumaraldehyde and 1,2-disinapoylglucoside, with an  
636 increase of about 1-10 folds, and ox2-16 displayed stronger effects than ox1-5  
637 ([Fig. 5A](#); [Supplementary Table S4](#)). However, flavonoids in ox1-5 stems were  
638 reduced to 3%-71% of WT, including km-3-O-sophoroside-7-O-glucoside, rutin,  
639 is-3-sophoroside-7-glucoside, km-3-O-sinapoylsophoroside-7-O-glucoside,  
640 qn-3-O-sophoroside, qn-3-O-glucoside, km-3-O-glucoside and  
641 is-3-O-glucoside; and ox2-16 showed the same trend as ox1-5 but with a less  
642 extent ([Supplementary Table S4](#)). Leaf extracts of ox1-5 and ox2-16 had  
643 similar variation tendency as in stems, but some compounds were  
644 undetectable in leaves or had an opposite change ([Supplementary Table S4](#)).  
645 Metabolites profiling was also performed on 30 DAP seeds. As expected, the  
646 CCR-downstream compounds sinapic acid and disinapoylgentiobiose were  
647 significantly increased in ox1-5 and ox2-16 ([Supplementary Table S5](#)). The  
648 contents of the most compounds of epicatechin, procyanidin, epicatechin  
649 polymers and other important flavonoids were significantly reduced (by even

650 more than 90% for some flavonoids) in ox1-5 compared with wild type, and  
651 ox2-16 showed the same trend as ox1-5 but with a less extent (Fig. 5B;  
652 [Supplementary Table S5](#)).

653 In metabolic profiling, glucosinolates were unexpectedly found to be  
654 drastically changed by *BnCCR* overexpression. A variety of aliphatic  
655 glucosinolates were distinctly differentially deposited between *BnCCRox* lines  
656 and WT. For example, 2(R)-2-hydroxy-3-butenyl glucosinolate,  
657 1-S-[(3S)-3-Hydroxy-N-(sulfoxy)-5-hexenimidoyl]-1-thio-beta-D-glucopyranos  
658 e, 3-butenylglucosinolate, isobutyl glucosinolate, 4-pentenyl glucosinolate,  
659 5-methylsulfinylpentyl glucosinolate and 5-methylthiopentyl glucosinolate were  
660 upregulated to hundreds of folds or even more than 1000 folds in ox1-5 stems  
661 as compared with WT, while in ox2-16 stems they were just slightly  
662 upregulated or even downregulated (Fig. 5C; [Supplementary Table S4](#)). In  
663 addition, 4-methylthiobutyl glucosinolate and 6-methylthiohexyl glucosinolate  
664 were obviously accumulated in ox1-5 stems (not in ox2-16 and WT stems).  
665 According to the quantitative results, glucosinolates had larger amounts of  
666 accumulation in leaves than in stems ([Supplementary Table S4](#)), and most of  
667 them in leaves were several folds higher in ox1-5 than in WT. However, most of  
668 them were downregulated by hundreds of folds in the leaves of ox2-16 in  
669 comparison with WT. 2(R)-2-Hydroxy-3-butenyl glucosinolate,  
670 1-S-[(3S)-3-Hydroxy-N-(sulfoxy)-5-hexenimidoyl]-1-thio-beta-D-glucopyranos  
671 e and 5-methylthiopentyl glucosinolate were even not detectable in the leaves  
672 of ox2-16 ([Supplementary Table S4](#)). Glucosinolates variation in seed coat was  
673 similar to that in the leaf ([Supplementary Table S5](#)). Modification of secondary  
674 metabolites in petioles was ultimately similar to that in stems ([Supplementary](#)  
675 [Table S6](#)).

#### 676 **Differential redirection of gene expression in lignin, flavonoid and** 677 **glucosinolate pathways in *BnCCR1* and *BnCCR2* over-expressors**

678 In *BnCCR1-2ox* lines, *BnCCR1* subfamily itself was significantly upregulated,

679 and *BnCCR2* subfamily showed no significant upregulation. In *BnCCR2-4ox*  
680 lines, the *BnCCR2* subfamily itself was undoubtedly greatly upregulated, while  
681 *BnCCR1* subfamily was also significantly upregulated (1-3 folds) in the stems,  
682 petioles and 30DAP seeds but significantly downregulated by 70% in the  
683 leaves (Supplementary Fig. S17). These results indicated that over-expression  
684 of *BnCCR1* subfamily had little impact on the expression of *BnCCR2* subfamily,  
685 but over-expression of *BnCCR2* subfamily could significantly upregulate or  
686 downregulate the expression of *BnCCR1* subfamily depending on different  
687 organs.

688 In the stems of both *BnCCR1-2ox* and *BnCCR2-4ox* lines, the common  
689 phenylpropanoid pathway loci *C4H* and *4CL* and the lignin-pathway early-step  
690 loci *C3H*, *HCT* and *CCoAOMT* were mildly upregulated (Fig. 6A), and  
691 *CCR*-downstream loci *CAD* and *F5H* were slightly upregulated. *COMT* was  
692 specific, apparently upregulated in the stems of *BnCCR1-2ox*, but  
693 downregulated to less than 10% in the stems of *BnCCR2-4ox* as compared  
694 with WT.

695 On the other hand, the expression of the flavonoid biosynthesis pathway  
696 was significantly downregulated in *BnCCRox* lines. Regulatory genes *TT1*,  
697 *TT2*, *TT16*, *TTG1* and *TTG2*, and structural genes *CHS*, *CHI*, *F3H*, *F3'H*, *FLS*,  
698 *ANR*, *TT19*, *GSTF11* and *TT12* were all suppressed to certain extent in 30DAP  
699 seeds of both *BnCCR1-2ox* and *BnCCR2-4ox* (Fig. 6B), with less extent in  
700 *BnCCR2-4ox* than in *BnCCR1-2ox*. *CHS*, *CHI*, *F3H*, *ANR* and *TT19* were  
701 downregulated to less than 20% in the 30DAP seeds of ox1-5 when compared  
702 with WT (Fig. 6B). The structural genes *AHA10* and *TT10* and the regulatory  
703 genes *TT8* and *MYB111* were significantly downregulated in 30DAP seeds of  
704 *BnCCR2-4ox*, but were unexpectedly significantly upregulated in the 30DAP  
705 seeds of *BnCCR1-2ox* lines (Fig. 6B). The overall downregulation of the whole  
706 flavonoid pathway could account for the reduction of the flavonoids in  
707 *BnCCRox* lines.



708 Most of the genes associated with the aliphatic glucosinolate biosynthesis,  
709 such as *MYB28*, *MYB29*, *CYP79F1*, *CYP83A1*, *AOP2* and *GSL*, were  
710 significantly upregulated in *BnCCR1ox* lines (Fig. 6C). Especially, the  
711 expression of *MYB29*, *CYP79F1* and *GSL* could hardly be detected in WT and  
712 *BnCCR2ox* lines, but was considerably expressed in *BnCCR1ox* lines. *AOP2*  
713 was a specific locus, which showed considerable downregulation in  
714 *BnCCR2ox*, a trend opposite to that in *BnCCR1ox* (Fig. 6C). The expression of  
715 most genes involved in indole glucosinolate biosynthesis, such as *MYB122*,  
716 *CYP79B2*, *ST5a* and *IGMT1*, was dramatically decreased in both *BnCCR1ox*  
717 and *BnCCR2ox* lines, except that *MYB34* was significantly upregulated in both  
718 *BnCCR1ox* and *BnCCR2ox* lines (Fig. 6C). *MYB51* was significantly  
719 upregulated in *BnCCR1ox* lines but extremely downregulated in *BnCCR2ox*  
720 lines, implying that *MYB51* may also be involved in aliphatic glucosinolate  
721 biosynthesis in *B. napus*.

## 722 Discussion

### 723 Both *BnCCR1* and *BnCCR2* are crucial for lignification, associated with 724 different monolignols and cellular types

725 Plants with downregulated CCR activities often displayed reduction in lignin  
726 content and alteration in lignin structure depending on different species  
727 (Goujon *et al.*, 2003; Zhou *et al.*, 2010; Prashant *et al.*, 2011). Lignin content  
728 had a great decrease in *Arabidopsis CCR1* mutant *irx4* (Jones *et al.*, 2001)  
729 and CCR-suppressed transgenic *Arabidopsis* (Goujon *et al.*, 2003), tobacco  
730 (Piquemal *et al.*, 1998), poplar (Leplé *et al.*, 2007), *Medicago truncatula* (Zhou  
731 *et al.*, 2010) and perennial ryegrass (Tu *et al.*, 2010).

732 In this study, anatomical observation and histochemical assays both  
733 indicated significant improvement of lignification in stems and roots in both  
734 *BnCCR1* and *BnCCR2* over-expressors, and *BnCCR1* over-expressor showed  
735 stronger effect on development of vessels and vascular bundles in xylem,

736 while *BnCCR2* over-expressor showed stronger effect on interfascicular fibers.

737 Furthermore, the S/G ratio was significantly decreased in *BnCCR1-2ox*,  
738 mainly due to the stronger increase of G-lignin, the S/G ratio in *BnCCR2-4ox*  
739 was significantly increased, mainly attributed to stronger increase of S-lignin.  
740 The alteration of S/G ratio caused by *CCR* manipulation always had different  
741 trends in different species. A lower S/G ratio, mainly caused by relatively  
742 stronger effect of *CCR* downregulation on S-units, was observed on  
743 *Arabidopsis irx4* mutants (Patten *et al.*, 2005), *CCR*-downregulated poplar  
744 (Leplé *et al.*, 2007) and *ccr1*-knockout *M. truncatula* mutants (Zhou *et al.*,  
745 2010). A higher S/G ratio, mainly caused by relatively stronger effect of *CCR*  
746 downregulation on G-units, was found in *CCR*-downregulated tobacco  
747 (Chabannes *et al.*, 2001), maize (Tamasloukht *et al.*, 2011), dallisgrass  
748 (Giordano *et al.*, 2014) and *CCR2*-knockout *M. truncatula* mutants (Zhou *et al.*,  
749 2010). No obvious change of S/G ratio was recorded in poplar (Leplé *et al.*,  
750 2007) and perennial ryegrass with *CCR* manipulation (Tu *et al.*, 2010).

751 Additionally, the H-lignin percentage in stems of *BnCCR1-2ox* was 2-3 folds  
752 higher than WT, and also more than one-fold higher in roots. Which could be  
753 caused by the enhanced accumulation of *p*-coumaraldehyde and expression  
754 of *F5H* and *COMT* in *BnCCR1-2* over-expressor. Reasonably,  
755 *p*-coumaroyl-CoA and caffeoyl-CoA might serve as the primary substrates for  
756 *BnCCR1* (as suggested in Fig. 7). In *CCR1*-downregulated perennial ryegrass  
757 (Tu *et al.*, 2010) and Mu-insertion maize mutant *Zmccr1* (Tamasloukht *et al.*,  
758 2011), the H-subunit level was reduced by about 50% and 31% respectively,  
759 suggesting that the optimal substrate of *CCR1* of perennial ryegrass and  
760 maize was *p*-coumaroyl-CoA. On the other hand, *BnCCR2* might prefer  
761 feruloyl-CoA as its major substrate, because of higher accumulation of S-units  
762 and its downstream derivatives sinapate esters, and higher increase in  
763 transcript level of *F5H* in *BnCCR2ox* as compared with *BnCCR1ox* (Fig. 7).

764 **Upregulation of *BnCCR* genes enhanced lodging resistance, modified**  
765 **morphology, but did not improve disease and UV-B resistance**

766 The expression perturbation of the genes located at the lignin biosynthetic  
767 pathway was often accompanied with defects in plant growth and development  
768 depending on which gene was targeted. For the severely silenced *CCR* plants,  
769 phenotypic abnormalities with irregular vessels usually arise, including plant  
770 size reduction, delayed flowering, delayed senescence, retarded seed  
771 development, biomass yield reduction and compromised pathogen defense  
772 (Leplé *et al.*, 2007; Zhou *et al.*, 2010; Vanholme *et al.*, 2012; Van Acker *et al.*,  
773 2014; Xue *et al.*, 2015; De Meester *et al.*, 2018; De Meester *et al.*, 2020).

774 Firstly, *BnCCR* over-expression improved lodging resistance compared with  
775 WT, especially for *BnCCR1-2ox* (Fig. 2; Supplementary Fig. S12). When *CCR1*  
776 was reintroduced into *A. thaliana ccr1* mutants under the control of the  
777 ProSNBE promoter, specific expression of *CCR1* in the protoxylem and  
778 metaxylem vessel cells showed a full recovery in vascular integrity (De  
779 Meester *et al.*, 2018). The breaking-resistance of both *BnCCR1-2ox* and  
780 *BnCCR2-4ox* plants was greatly enhanced in comparison with WT, with larger  
781 effect in *BnCCR1-2ox* lines than in *BnCCR2-4ox* lines. These results imply an  
782 improved lodging resistance of *BnCCRox* lines due to better development and  
783 growth in both morphology and lignification of roots and stems, which provides  
784 significant potential in molecular breeding of rapeseed with enhanced lodging  
785 resistance through over-expressing *BnCCR* genes.

786 Secondly, *BnCCR* over-expression also modified leaf morphology. Our  
787 Mäule staining results indicated that rapeseed petiole xylem was exclusively  
788 composed of vascular bundles without interfascicular fibers, which could  
789 account for better development of leaf veins in *BnCCR1-2ox* plants, since  
790 vascular bundles contained higher proportion of G-lignin and *BnCCR1-2* was  
791 mainly involved in the biosynthesis of G- and H-lignins. In *Arabidopsis*, *CCR1*  
792 also mediated cell proliferation exit for leaf development, and *ccr1-4* mutant  
793 had a significantly reduced leaf and plant size compared with WT (Xue *et al.*,  
794 2015). However, *BnCCR2-4ox* plants showed less developed leaf vascular  
795 bundles (Fig. 40; Supplementary Fig. S12J), which could possibly be resulted  
796 from two reasons: weakened G-unit synthesis (since *BnCCR2-4*  
797 overexpression mainly forced S-unit synthesis), and downregulated *BnCCR1*  
798 expression in leaves of *BnCCR2-4ox* plants (Supplementary Fig. S17B).

799 Enhanced levels of ABA might also play a role in the alteration of leaf  
800 phenotypes of *BnCCRox* plants (Supplementary Fig. S13), as ABA plays  
801 important roles in plant growth and development (Cutler *et al.*, 2010).

802 Thirdly, resistance of *BnCCRox* plants to *S. sclerotiorum* and UV-B was not  
803 improved, which was in conflict with traditional notion and our original  
804 expectation. There are many factors involved in plant disease resistance, such  
805 as the epidermal cuticle-wax layers, trichomes, lignified cell walls, phenolics,  
806 phytoalexins and pathogenesis-related proteins (Zhao *et al.*, 2007a). In the  
807 present study, although the lignin content was increased through *BnCCR*  
808 over-expression, the other important factors correlated to the plant resistance  
809 were not enhanced or even suppressed by flux competition between lignin  
810 pathway and flavonoid and other pathways, which could be reflected by the  
811 changes of flavonoid and glucosinolate metabolic profiles. Besides, decrease  
812 of epidermal wax layer was observed on leaves of *BnCCR1-2ox* plants  
813 compared with *BnCCR2-4ox* and WT (Supplementary Fig. S18).

#### 814 ***BnCCR1* and *BnCCR2* differentially affect plant development progress**

815 During the progress of the growth and development of *BnCCRox* plants, the  
816 upper stem of *BnCCR1-2ox* plants at bolting stage was more easily to bend,  
817 but *BnCCR2-4ox* plants had no such case (Fig. 2F; Supplementary Fig. S12A).  
818 As reported, S-lignin percentage in stems would gradually increase during  
819 plant growth process (Tu *et al.*, 2010; Giordano *et al.*, 2014). Mäule staining of  
820 stem cross sections in this study revealed similar trend (Supplementary Fig.  
821 S19), suggesting that S-lignin might play an important role for maturation and  
822 mechanical strength of stems. (Kaur *et al.*, 2012) found that the stem of  
823 *CAD*-downregulated *Nicotiana* plants (*ir-CAD*) presented a rubbery  
824 phenomenon, and the S/G ratio was significantly reduced. Here the S/G ratio  
825 was also significantly decreased in *BnCCR1-2ox* plants (1.29 in WT, 0.68 in  
826 *ox1-5*, and 0.98 in *ox1-12*). Moreover, our results showed that in WT the S/G  
827 ratio in stem (1.29) was significantly higher than in root (0.49), which might be  
828 one factor contributing to the more flexible texture of roots compared with

829 stems, although total lignin content was higher in root than in stem (Fig. 4R  
830 and S). Lower percentage of S-units might contribute to a lower level of  
831 stiffness of the stem, together with the lower lignin content in the upper stem,  
832 which might be one reason of the bending phenomenon of *BnCCR1-2ox* at  
833 bolting stage. However, when *BnCCR1-2ox* plants entered flowering stage, the  
834 bending phenomenon disappeared, which might be due to increase in total  
835 lignin content and S-lignin percentage in stems (Supplementary Fig. S19).  
836 Relationship between S/G ratio and the texture of the plant stems was  
837 summarized in the Supplementary Table S7. These results suggest that higher  
838 S/G ratio might contribute to stronger stiffness in plant stems, which is  
839 manifested during reproductive growth.

840 In this study, *BnCCR1-2ox* plants flowered distinctly later than WT and  
841 *BnCCR2-4ox* plants, implying that the function of Brassicaceae *CCR1* is also  
842 associated with plant development progress. There was an evolutionarily  
843 conserved mechanism between cell wall biosynthesis and production of  
844 flowers (Vermeris *et al.*, 2002). The delayed accumulation of S-lignin and  
845 lowered stem stiffness at bolting stage were reflections of delayed  
846 development progress and flowering in *BnCCR1-2ox* plants.

#### 847 ***BnCCR1* and *BnCCR2* exert different flux control on flavonoid pathway** 848 **and lignin-derivative pathways in *B. napus***

849 In metabolic engineering, products, precursor steps as well as associated  
850 neighbor pathways would be affected via metabolic flux redirection. In lignin  
851 engineering, for example, significantly higher amounts of vanillin, ferulic acid,  
852 *p*-coumaric acid, coniferaldehyde and syringaldehyde were released from the  
853 cell wall samples of *MtCAD1* mutants than the wild-type (Zhao *et al.*, 2013). In  
854 the *C3H* (Abdulrazzak *et al.*, 2006) or *HCT* (Besseau *et al.*, 2007) defect  
855 *Arabidopsis*, *C3H1*-downregulated maize (Fornalé *et al.*, 2015), *CCR*-silenced  
856 tomato (van der Rest *et al.*, 2006) and perennial ryegrass (Tu *et al.*, 2010), the  
857 accumulation of flavonoids was significantly increased.

858 Besides enhancement of lignin monomers, our results also showed that both

859 *BnCCR1-2* and *BnCCR2-4* over-expressors had significantly increased levels  
860 of various CCR-downstream pathway products when compared with WT,  
861 especially for sinapate esters (Fig. 5; Supplementary Tables S4-S6), which  
862 could be caused by the enhanced expression levels of corresponding genes  
863 *CCR*, *F5H*, *COMT* and *CAD*. Moreover, *BnCCR2-4ox* plants had a stronger  
864 effect on the accumulation of sinapate esters in stems than *BnCCR1-2ox*  
865 plants, implying that the metabolic route related to *BnCCR2* catabolism (mainly  
866 S-units synthesis) might be closer to sinapate ester pathway than *BnCCR1*  
867 (Fig. 5A; Fig. 7).

868 More strikingly, many compounds synthesized in flavonoid pathway were  
869 significantly reduced in *BnCCRox* plants compared with WT. The dramatic  
870 reduction in flavonoids was theoretically caused by the reduced availability of  
871 *p*-coumaroyl-CoA precursor for CHS as *BnCCR* overexpression attracted more  
872 of this common precursor into lignin pathway (Fig. 7). This kind of flux shift  
873 could be further evidenced on molecular level (Fig. 6). Seed color degree,  
874 metabolic profile and gene expression profile all indicated that suppression  
875 impact on flavonoid pathway was greater in *BnCCR1-2ox* plants than in  
876 *BnCCR2-4ox* plants (Figs 3 and 6; Supplementary Tables S4-S6). Which could  
877 result from the fact that the metabolic routes of *BnCCR1* catabolism (mainly H-  
878 and G-units synthesis) were closer to flavonoid pathway than that of *BnCCR2*  
879 (mainly S-unit synthesis) as suggested in Fig. 7.

### 880 ***BnCCR1* and *BnCCR2* play different roles in crosstalk between** 881 **phenylpropanoid pathway and glucosinolate pathway**

882 There were a few reports on crosstalk effect of glucosinolate pathway on  
883 phenylpropanoid pathway (Hemm *et al.*, 2003; Kim *et al.*, 2015; Kim *et al.*,  
884 2020). In *Arabidopsis*, the accumulation of phenylpropanoids were significantly  
885 suppressed in *ref5-1* mutant, and *REF5* was proved to encode CYP83B1  
886 which was involved in biosynthesis of indole glucosinolates (Kim *et al.*, 2015).  
887 Defect of phenylpropanoids deposition was also detected in *Arabidopsis ref2*  
888 mutant, as *REF2* encoded CYP83A1 which played a role in aliphatic  
889 glucosinolate pathway (Hemm *et al.*, 2003). In low-lignin *c4h*, *4cl1*, *ccoamt1*  
890 and *ccr1* mutants of *Arabidopsis*, transcripts of some glucosinolate

891 biosynthesis genes were more abundant (Vanholme *et al.*, 2012). However, to  
892 date there is no systemic study on crosstalk effect of phenylpropanoid pathway  
893 on glucosinolate pathway.

894 In present study, the aliphatic glucosinolates were significantly increased in  
895 *BnCCR1-2ox* (Supplementary Table S4), which could result from upregulated  
896 expression of *MYB28*, *MYB29*, *CYP79F1*, *CYP83A1*, *AOP2* and *GSL* in the  
897 leaves of transgenic plants (Fig. 6). Among them, the expression of *MYB29*,  
898 *CYP79F1* and *GSL* could almost only be detected in *BnCCR1-2ox*, not in WT.  
899 Reasonably, the undetectable *MYB29* expression and extremely lower  
900 expression of *MYB51*, *MYB122*, *AOP2*, *CYP79B2*, *ST5a* and *IGMT1* in  
901 *BnCCR2-4ox* plants could be responsible for the decrease of glucosinolate  
902 content. Because the WT material ZS10 of this study was a “double-low” (low  
903 erucic acid, low glucosinolates) commercial cultivar, the low proportion of  
904 indole and aromatic glucosinolates in WT and the limited change of indole and  
905 aromatic glucosinolates in *BnCCR*-overexpressing plants might be caused by  
906 breeding impairment of respective biosynthesis pathways of these two types of  
907 glucosinolates. If a “double-high” stock was used as WT for *BnCCR*  
908 transformation, the effect on indole and aromatic glucosinolates deposition  
909 might not be so mild. Taken together, both *BnCCR1-2* and *BnCCR2-4* distinctly  
910 affect glucosinolate biosynthesis, but have divergent or almost opposite  
911 effects.

912 Crosstalk effect of glucosinolate pathway on phenylpropanoid pathway could  
913 be linked through PAL degradation that mediated by Med5-KFBs-dependent  
914 manner (Kim *et al.*, 2020). However, what mechanism is involved in change of  
915 glucosinolate biosynthesis by manipulating phenylpropanoid genes, such as  
916 *CCR*, needs to be clarified. Our qRT-PCR results indicate that at least  
917 transcription regulation is involved, but whether mediator-mediated protein  
918 degradation in glucosinolate pathway is also involved deserves future study.

#### 919 **Supplementary data**

920 **Fig. S1.** Southern blot detection of *CCR* subfamily genes in *B. napus*, *B. rapa*  
921 and *B. oleracea*.

922 **Fig. S2.** Multi-alignment indicates that *Brassica* CCRs contain complete  
923 structural features as those in model plants *A. thaliana* and poplar.

924 **Fig. S3.** Overall expression patterns of *CCR1*-subfamily and *CCR2*-subfamily  
925 show distinct organ-specificity and difference between black and yellow seeds  
926 in *B. napus*, *B. rapa* and *B. oleracea*.

927 **Fig. S4.** Expression patterns of *CCR1*-genes and *CCR2*-genes show distinct  
928 organ-specificity and difference between black and yellow seeds in *B. napus*.

929 **Fig. S5.** Expression patterns of *CCR1*-genes and *CCR2*-genes show distinct  
930 organ-specificity and difference between black and yellow seeds in *B. rapa*.

931 **Fig. S6.** Expression patterns of *CCR1*-genes and *CCR2*-genes show distinct  
932 organ-specificity and difference between black and yellow seeds in *B.*  
933 *oleracea*.

934 **Fig. S7.** Overall expression of *BnCCR1*-subfamily and *BnCCR2*-subfamily  
935 distinctly respond to various stresses in *B. napus* seedlings.

936 **Fig. S8.** *BnCCR1*-genes and *BnCCR2*-genes distinctly respond to various  
937 stresses in *B. napus* seedlings.

938 **Fig. S9.** Basta-resistance, GUS-staining and PCR determination of transgenic  
939 lines.

940 **Fig. S10.** qRT-PCR shows distinct upregulation of the target genes in  
941 respective T2 lines of *BnCCR1-2ox* and *BnCCR2-4ox*.

942 **Fig. S11.** Multiple agronomic traits are significantly modified in *BnCCR1-2ox*  
943 and *BnCCR2-4ox* lines.

944 **Fig. S12.** *BnCCR1-2ox* and *BnCCR2-4ox* lines show different growth  
945 behaviors and leaf vein strengths.

946 **Fig. S13.** ABA content is upregulated in leaves of *BnCCR1-2ox* and  
947 *BnCCR2-4ox* lines.



948 **Fig. S14.** Plants of both *BnCCR1-2ox* and *BnCCR2-4ox* do not show  
949 enhanced resistance to *S. sclerotiorum* and UV-B.

950 **Fig. S15.** GC-MS chromatograms show different changes of monoglignol  
951 proportions in *BnCCR1-2ox* and *BnCCR2-4ox* lines.

952 **Fig. S16.** Contents of cellulose and hemicellulose in the stems of *BnCCR1-2ox*  
953 and *BnCCR2-4ox* lines are not changed based on NIRS detection.

954 **Fig. S17.** *BnCCR1* expression is obviously altered in *BnCCR2-4ox* lines,  
955 whereas *BnCCR2* expression has little change in *BnCCR1-2ox* lines.

956 **Fig. S18.** Leaf surfaces of *BnCCR1-2ox* and *BnCCR2-4ox* plants are less flat  
957 with decreased wax deposition than WT.

958 **Fig. S19.** Mäule staining of stem sections indicates a trend of increase of  
959 S-type lignins during developmental process in *B. napus*.

960 **Table S1.** Identity parameters of *CCR1*-subfamily and *CCR2*-subfamily genes  
961 from *B. napus* and its parental species *B. oleracea* and *B. rapa*.

962 **Table S2.** cDNA and gDNA basic parameters of *Brassica CCR1* and *CCR2*  
963 subfamily genes cloned in this study.

964 **Table S3.** Basic parameters and important features of *Brassica CCR1* and  
965 *CCR2* proteins.

966 **Table S4.** Contents of major soluble secondary metabolites differentially  
967 accumulated in stems and leaves of ox1-5 and ox2-16 compared with WT as  
968 revealed by UPLC-HESI-MS/MS.

969 **Table S5.** Contents of major soluble secondary metabolites differentially  
970 accumulated in 30DAP seeds of ox1-5 and ox2-16 compared with WT as  
971 revealed by UPLC-HESI-MS/MS.

972 **Table S6.** Contents of major soluble secondary metabolites differentially  
973 accumulated in petioles of ox1-5 and ox2-16 compared with WT as revealed  
974 by UPLC-HESI-MS/MS.

975 **Table S7.** S/G ratio of stem lignin, stem stiffness, and plant phenotype of  
976 different angiosperm species.

977 **Table S8.** Primers used in this study.

### 978 **Acknowledgements**

979 We thank Prof Xuekuan Zhang for providing Zhongshuang 10 seeds, Prof Wei  
980 Qian for providing the *S. sclerotiorum* source strain, Prof Ningjia He, Dr.  
981 Guangyu Ding and Dr. Shiyao Liu for assistance on GC-MS measurements.  
982 This research was supported by National Natural Science Foundation of China  
983 (31871549, 32001579, 31830067 and 31171177), National Key R&D Program  
984 of China (2016YFD0100506), Special financial aid to post-doctor research  
985 fellow of Chongqing (XmT2018057), “111” Project (B12006), and Young  
986 Eagles Program of Chongqing Municipal Commission of Education  
987 (CY200215).

### 988 **Conflict of interest**

989 The authors declare no conflict of interest.

### 990 **Author contributions**

991 Y.C., J.L. and N.Y. designed the study; N.Y., B.L., X.L. and Y.X. performed the  
992 experiments; Y.C. did molecular and bioinformatic analysis, N.Y., J.L., M.C.,  
993 K.L., L.W. and Y.L. analyzed or evaluated the results; J.L. and R.W. provided  
994 some *Brassica* materials. N.Y. and Y.C. performed final analysis and wrote the  
995 article.

### 996 **Data availability statement**

997 The data supporting the findings of this study are available from the

998 corresponding author (Jiana Li and Yourong Chai) upon request.

999

## References

- Abdulrazzak N, Pollet B, Ehlting J, Larsen K, Asnaghi C, Ronseau S, Proux C, Erhardt M, Seltzer V, Renou JP, Ullmann P, Pauly M, Lapierre C, Werck-Reichhart D.** 2006. A coumaroyl-ester-3-hydroxylase insertion mutant reveals the existence of nonredundant meta-hydroxylation pathways and essential roles for phenolic precursors in cell expansion and plant growth. *Plant Physiology* **140**, 30-48.
- Acreche MM, Slafer GA.** 2011. Lodging yield penalties as affected by breeding in Mediterranean wheats. *Field Crops Research* **122**, 40-48.
- Auger B, Marnet N, Gautier V, Maia-Grondard A, Leprince F, Renard M, Guyot S, Nesi N, Routaboul JM.** 2010. A detailed survey of seed coat flavonoids in developing seeds of *Brassica napus* L. *Journal of Agricultural and Food Chemistry* **58**, 6246-6256.
- Bart RS, Chern M, Vega-Sanchez ME, Canlas P, Ronald PC.** 2010. Rice *Snl6*, a *cinnamoyl-coa reductase-like* gene family member, is required for *nh1*-mediated immunity to *Xanthomonas oryzae* pv. *oryzae*. *Plos Genetics* **6**, e1001123.
- Baucher M, Halpin C, Petit-Conil M, Boerjan W.** 2003. Lignin: genetic engineering and impact on pulping. *Critical Reviews In Biochemistry And Molecular Biology* **38**, 305-350.
- Berry PM.** 2018. Lodging resistance in cereals. in: meyers r. (eds) encyclopedia of sustainability science and technology. Springer **New York**, NY. [https://doi.org/10.1007/1978-1001-4939-2493-1006\\_1228-1003](https://doi.org/10.1007/1978-1001-4939-2493-1006_1228-1003).
- Besseau S, Hoffmann L, Geoffroy P, Lapierre C, Pollet B, Legrand M.** 2007. Flavonoid accumulation in *Arabidopsis* repressed in lignin synthesis affects auxin transport and plant growth. *The Plant Cell* **19**, 148-162.
- Caño-Delgado A, Penfield S, Smith C, Catley M, Bevan M.** 2003. Reduced cellulose synthesis invokes lignification and defense responses in *Arabidopsis thaliana*. *The Plant Journal* **34**, 351-362.
- Cardoza V, Stewart CN.** 2003. Increased *Agrobacterium*-mediated transformation and rooting efficiencies in canola (*Brassica napus* L.) from hypocotyl segment explants. *Plant Cell Reports* **21**, 599-604.
- Chabannes M, Barakate A, Lapierre C, Marita JM, Ralph J, Pean M, Danoun S, Halpin C, Grima-Pettenati J, Boudet AM.** 2001. Strong decrease in lignin content without significant alteration of plant development is induced by simultaneous down-regulation of *cinnamoyl CoA reductase (CCR)* and *cinnamyl alcohol dehydrogenase (CAD)* in tobacco plants. *The Plant Journal* **28**, 257-270.
- Chang XF, Chandra R, Berleth T, Beatson RP.** 2008. Rapid, microscale, acetyl bromide-based method for high-throughput determination of lignin content in *Arabidopsis thaliana*. *Journal of Agricultural and Food Chemistry* **56**, 6825-6834.
- Chantreau M, Portelet A, Dauwe R, Kiyoto S, Cronier D, Morreel K,**

- Arribat S, Neutelings G, Chabi M, Boerjan W, Yoshinaga A, Mesnard F, Grec S, Chabbert B, Hawkins S.** 2014. Ectopic lignification in the flax lignified bast *fiber1* mutant stem is associated with tissue-specific modifications in gene expression and cell wall composition. *The Plant Cell* **26**, 4462-4482.
- Chao N, Jiang WT, Wang XC, Jiang XN, Gai Y.** 2019. Novel motif is capable of determining CCR and CCR-like proteins based on the divergence of CCRs in plants. *Tree Physiology* **39**, 2019-2026.
- Chapple CCS, Vogt T, Ellis BE, Somerville CR.** 1992. An *Arabidopsis* mutant defective in the general phenylpropanoid pathway. *The Plant Cell* **4**, 1413-1424.
- Chen L, Auh C, Chen F, Cheng XF, Aljoe H, Dixon RA, Wang ZY.** 2002. Lignin deposition and associated changes in anatomy, enzyme activity, gene expression, and ruminal degradability in stems of tall fescue at different developmental stages. *Journal of Agricultural and Food Chemistry* **50**, 5558-5565.
- Costa S, Dolan L.** 2003. Epidermal patterning genes are active during embryogenesis in *Arabidopsis*. *Development* **130**, 2893-2901.
- Cutler SR, Rodriguez PL, Finkelstein RR, Abrams SR.** 2010. Abscisic acid: emergence of a core signaling network. *Annual Review Of Plant Biology* **61**, 651-679.
- Dauwe R, Morreel K, Goeminne G, Gielen B, Rohde A, Van Beeumen J, Ralph J, Boudet AM, Kopka J, Rochange SF, Halpin C, Messens E, Boerjan W.** 2007. Molecular phenotyping of lignin-modified tobacco reveals associated changes in cell-wall metabolism, primary metabolism, stress metabolism and photorespiration. *The Plant Journal* **52**, 263-285.
- De Meester B, Calderón BM, de Vries L, Pollier J, Goeminne G, Van Doorselaere J, Chen M, Ralph J, Vanholme R, Boerjan W.** 2020. Tailoring poplar lignin without yield penalty by combining a null and haploinsufficient *CINNAMOYL-CoA REDUCTASE2* allele. *Nature Communications* **11**, 1-13.
- De Meester B, de Vries L, Ozparpucu M, Gierlinger N, Corneillie S, Pallidis A, Goeminne G, Morreel K, De Bruyne M, De Rycke R, Vanholme R, Boerjan W.** 2018. Vessel-specific reintroduction of *CINNAMOYL-CoA REDUCTASE1 (CCR1)* in dwarfed *ccr1* mutants restores vessel and xylary fiber integrity and increases biomass. *Plant Physiology* **176**, 611-633.
- del Río LE, Bradley CA, Henson RA, Endres GJ, Hanson BK, McKay K, Halvorson M, Porter PM, Le Gare DG, Lamey HA.** 2007. Impact of *Sclerotinia* stem rot on yield of canola. *Plant Disease* **91**, 191-194.
- Ding YJ, Mei JQ, Liu Y, Wang L, Li YH, Wan HF, Li JN, Qian W.** 2015. Transfer of *sclerotinia* stem rot resistance from wild *Brassica oleracea* into *B-rapa*. *Molecular Breeding* **35**, 225.
- Escamilla-Treviño LL, Shen H, Uppalapati SR, Ray T, Tang YH, Hernandez T, Yin YB, Xu Y, Dixon RA.** 2010. Switchgrass (*Panicum virgatum*) possesses a divergent family of cinnamoyl CoA reductases with distinct biochemical properties. *New Phytologist* **185**, 143-155.

- Fornalé S, Rencoret J, Garcia-Calvo L, Capellades M, Encina A, Santiago R, Rigau J, Gutierrez A, del Rio JC, Caparros-Ruiz D.** 2015. Cell wall modifications triggered by the down-regulation of *Coumarate 3-hydroxylase-1* in maize. *Plant Science* **236**, 272-282.
- Fu C, Chai YR, Ma LJ, Wang R, Hu K, Wu JY, Li JN, Liu X, Lu JX.** 2017. Evening primrose (*Oenothera biennis*)  $\Delta 6$  fatty acid desaturase gene family: cloning, characterization, and engineered GLA and SDA production in a staple oil crop. *Molecular Breeding* **37**(6), 83.
- Fukushima RS, Hatfield RD.** 2001. Extraction and isolation of lignin for utilization as a standard to determine lignin concentration using the acetyl bromide spectrophotometric method. *Journal of Agricultural and Food Chemistry* **49**, 3133-3139.
- Giordano A, Liu ZQ, Panter SN, Dimech AM, Shang YJ, Wijesinghe H, Fulgueras K, Ran YD, Mouradov A, Rochfort S, Patron NJ, Spangenberg GC.** 2014. Reduced lignin content and altered lignin composition in the warm season forage grass *Paspalum dilatatum* by down-regulation of a *Cinnamoyl CoA Reductase* Gene. *Transgenic Research* **23**, 503-517.
- Goujon T, Ferret V, Mila I, Pollet B, Ruel K, Burlat V, Joseleau JP, Barriere Y, Lapierre C, Jouanin L.** 2003. Down-regulation of the *AtCCR1* gene in *Arabidopsis thaliana*: effects on phenotype, lignins and cell wall degradability. *Planta* **217**, 218-228.
- Hemm MR, Ruegger MO, Chapple C.** 2003. The *Arabidopsis ref2* mutant is defective in the gene encoding CYP83A1 and shows both phenylpropanoid and glucosinolate phenotypes. *The Plant Cell* **15**, 179-194.
- Hoffmann L, Besseau S, Geoffroy P, Ritzenthaler C, Meyer D, Lapierre C, Pollet B, Legrand M.** 2004. Silencing of hydroxycinnamoyl-coenzyme A shikimate/quinic hydroxycinnamoyltransferase affects phenylpropanoid biosynthesis. *The Plant Cell* **16**, 1446-1465.
- Huang JL, Gu M, Lai ZB, Fan BF, Shi K, Zhou YH, Yu JQ, Chen ZX.** 2010. Functional analysis of the *Arabidopsis PAL* gene family in plant growth, development, and response to environmental stress. *Plant Physiology* **153**, 1526-1538.
- Jones L, Ennos AR, Turner SR.** 2001. Cloning and characterization of irregular xylem4 (*irx4*): a severely lignin-deficient mutant of *Arabidopsis*. *The Plant Journal* **26**, 205-216.
- Kaur H, Shaker K, Heinzl N, Ralph J, Galis I, Baldwin IT.** 2012. Environmental stresses of field growth allow cinnamyl alcohol dehydrogenase-deficient *Nicotiana Attenuata* plants to compensate for their structural deficiencies. *Plant Physiology* **159**, 1545-1570.
- Kawasaki T, Koita H, Nakatsubo T, Hasegawa K, Wakabayashi K, Takahashi H, Urnemura K, Urnezawa T, Shimamoto K.** 2006. Cinnamoyl-CoA reductase, a key enzyme in lignin biosynthesis, is an effector of small GTPase Rac in defense signaling in rice. *Proceedings of the National Academy of Sciences of the United States of America* **103**, 230-235.

- Kendall SL, Holmes H, White CA, Clarke SM, Berry PM.** 2017. Quantifying lodging-induced yield losses in oilseed rape. *Field Crops Research* **211**, 106-113.
- Kim JI, Dolan WL, Anderson NA, Chapple C.** 2015. Indole glucosinolate biosynthesis limits phenylpropanoid accumulation in *Arabidopsis thaliana*. *The Plant Cell* **27**, 1529-1546.
- Kim JI, Zhang X, Pascuzzi PE, Liu CJ, Chapple C.** 2020. Glucosinolate and phenylpropanoid biosynthesis are linked by proteasome-dependent degradation of PAL. *New Phytologist* **225**, 154-168.
- Ko JK, Ximenes E, Kim Y, Ladisch MR.** 2015. Adsorption of enzyme onto lignins of liquid hot water pretreated hardwoods. *Biotechnology and Bioengineering* **112**, 447-456.
- Labeeuw L, Martone PT, Boucher Y, Case RJ.** 2015. Ancient origin of the biosynthesis of lignin precursors. *Biology Direct* **10**.23.
- Lacombe E, Hawkins S, VanDoorselaere J, Piquemal J, Goffner D, Poeydomenge O, Boudet AM, GrimaPettenati J.** 1997. Cinnamoyl CoA reductase, the first committed enzyme of the lignin branch biosynthetic pathway: Cloning, expression and phylogenetic relationships. *The Plant Journal* **11**, 429-441.
- Lapierre C, Pollet B, Rolando C.** 1995. New insights into the molecular architecture of hardwood lignins by chemical degradative methods. *Research on Chemical Intermediates* **21**, 397-412.
- Lauvergeat V, Lacombe C, Lacombe E, Lasserre E, Roby D, Grima-Pettenati J.** 2001. Two *cinnamoyl-CoA reductase (CCR)* genes from *Arabidopsis thaliana* are differentially expressed during development and in response to infection with pathogenic bacteria. *Phytochemistry* **57**, 1187-1195.
- Lee MH, Jeon HS, Kim SH, Chung JH, Roppolo D, Lee HJ, Cho HJ, Tobimatsu Y, Ralph J, Park OK.** 2019. Lignin-based barrier restricts pathogens to the infection site and confers resistance in plants. *Embo Journal* **38**(6), 83.
- Lep le JC, Dauwe R, Morreel K, Storme V, Lapierre C, Pollet B, Naumann A, Kang KY, Kim H, Ruel K, Lefebvre A, Joseleau JP, Grima-Pettenati J, De Rycke R, Andersson-Gunneras S, Erban A, Fehrle I, Petit-Conil M, Kopka J, Polle A, Messens E, Sundberg B, Mansfield SD, Ralph J, Pilate G, Boerjan W.** 2007. Downregulation of cinnamoyl-coenzyme a reductase in poplar: Multiple-level phenotyping reveals effects on cell wall polymer metabolism and structure. *The Plant Cell* **19**, 3669-3691.
- Li X, Bonawitz ND, Weng JK, Chapple C.** 2010. The growth reduction associated with repressed lignin biosynthesis in *Arabidopsis thaliana* is independent of flavonoids. *The Plant Cell* **22**, 1620-1632.
- Li X, Weng JK, Chapple C.** 2008. Improvement of biomass through lignin modification. *The Plant Journal* **54**, 569-581.
- Liu C, Wang JL, Huang TD, Wang F, Yuan F, Cheng XM, Zhang Y, Shi SW, Wu JS, Liu KD.** 2010. A missense mutation in the VHYNP motif of a DELLA

protein causes a semi-dwarf mutant phenotype in *Brassica napus*. Theoretical and Applied Genetics **121**, 249-258.

**Ma QH**. 2009. The expression of *caffeic acid 3-O-methyltransferase* in two wheat genotypes differing in lodging resistance. Journal of Experimental Botany **60**, 2763-2771.

**Naczki M, Amarowicz R, Pink D, Shahidi F**. 2000. Insoluble condensed tannins of canola/rapeseed. Journal of Agricultural and Food Chemistry **48**, 1758-1762.

**Pan LG, Assirelli A, Suardi A, Civitarese V, Del Giudice A, Costa C, Santangelo E**. 2012. The harvest of oilseed rape (*Brassica napus* L.): The effective yield losses at on-farm scale in the Italian area. Biomass & Bioenergy **46**, 453-458.

**Patten AM, Cardenas CL, Cochrane FC, Laskar DD, Bedgar DL, Davin LB, Lewis NG**. 2005. Reassessment of effects on lignification and vascular development in the *irx4 Arabidopsis* mutant. Phytochemistry **66**, 2092-2107.

**Peng DL, Chen XG, Yin YP, Lu KL, Yang WB, Tang YH, Wang ZL**. 2014. Lodging resistance of winter wheat (*Triticum aestivum* L.): Lignin accumulation and its related enzymes activities due to the application of paclobutrazol or gibberellin acid. Field Crops Research **157**, 1-7.

**Piquemal J, Lapierre C, Myton K, O'Connell A, Schuch W, Grima-Pettenati J, Boudet AM**. 1998. Down-regulation of cinnamoyl-CoA reductase induces significant changes of lignin profiles in transgenic tobacco plants. The Plant Journal **13**, 71-83.

**Porebski S, Bailey LG, Baum BR**. 1997. Modification of a CTAB DNA extraction protocol for plants containing high polysaccharide and polyphenol components. Plant Molecular Biology Reporter **15**, 8-15.

**Prashant S, Sunita MS, Pramod S, Gupta RK, Kumar SA, Karumanchi SR, Rawal SK, Kishor PBK**. 2011. Down-regulation of *Leucaena leucocephala cinnamoyl CoA reductase (LICCR)* gene induces significant changes in phenotype, soluble phenolic pools and lignin in transgenic tobacco. Plant Cell Reports **30**, 2215-2231.

**Qu CM, Fu FY, Lu K, Zhang K, Wang R, Xu XF, Wang M, Lu JX, Wan HF, Tang ZL, Li JN**. 2013. Differential accumulation of phenolic compounds and expression of related genes in black- and yellow-seeded *Brassica napus*. Journal of Experimental Botany **64**, 2885-2898.

**Robinson AR, Mansfield SD**. 2009. Rapid analysis of poplar lignin monomer composition by a streamlined thioacidolysis procedure and near-infrared reflectance-based prediction modeling. The Plant Journal **58**, 706-714.

**Ruel K, Berrio-Sierra J, Derikvand MM, Pollet B, Thevenin J, Lapierre C, Jouanin L, Joseleau JP**. 2009. Impact of *CCR1* silencing on the assembly of lignified secondary walls in *Arabidopsis thaliana*. New Phytologist **184**, 99-113.

**Tamasloukht B, Lam MSJWQ, Martinez Y, Tozo K, Barbier O, Jourda C, Jauneau A, Borderies G, Balzergue S, Renou JP, Huguet S, Martinant JP, Tatout C, Lapierre C, Barriere Y, Goffner D, Pichon M**. 2011.



Characterization of a *cinnamoyl-CoA reductase 1 (CCR1)* mutant in maize: effects on lignification, fibre development, and global gene expression. *Journal of Experimental Botany* **62**, 3837-3848.

**Thévenin J, Pollet B, Letarnec B, Saulnier L, Gissot L, Maia-Grondard A, Lapiere C, Jouanin L.** 2011. The simultaneous repression of CCR and CAD, two enzymes of the lignin biosynthetic pathway, results in sterility and dwarfism in *Arabidopsis thaliana*. *Molecular Plant* **4**, 70-82.

**Tu Y, Rochfort S, Liu ZQ, Ran YD, Griffith M, Badenhorst P, Louie GV, Bowman ME, Smith KF, Noel JP, Mouradov A, Spangenberg G.** 2010. Functional analyses of *caffeic acid O-methyltransferase* and *cinnamoyl-CoA-reductase* genes from perennial ryegrass (*Lolium perenne*). *The Plant Cell* **22**, 3357-3373.

**Van Acker R, Leple JC, Aerts D, Storme V, Goeminne G, Ivens B, Legee F, Lapiere C, Piens K, Van Montagu MCE, Santoro N, Foster CE, Ralph J, Soetaert W, Pilate G, Boerjan W.** 2014. Improved saccharification and ethanol yield from field-grown transgenic poplar deficient in cinnamoyl-CoA reductase. *Proceedings of the National Academy of Sciences of the United States of America* **111**, 845-850.

**van der Rest B, Danoun S, Boudet AM, Rochange SF.** 2006. Down-regulation of cinnamoyl-CoA reductase in tomato (*Solanum lycopersicum* L.) induces dramatic changes in soluble phenolic pools. *Journal of Experimental Botany* **57**, 1399-1411.

**Vanholme R, Demedts B, Morreel K, Ralph J, Boerjan W.** 2010. Lignin biosynthesis and structure. *Plant Physiology* **153**, 895-905.

**Vanholme R, Storme V, Vanholme B, Sundin L, Christensen JH, Goeminne G, Halpin C, Rohde A, Morreel K, Boerjan W.** 2012. A Systems biology view of responses to lignin biosynthesis perturbations in *Arabidopsis*. *The Plant Cell* **24**, 3506-3529.

**Vermerris W, Thompson KJ, McIntyre LM, Axtell JD.** 2002. Evidence for an evolutionarily conserved interaction between cell wall biosynthesis and flowering in maize and sorghum. *BMC Evolutionary Biology* **2**, 1-8.

**Wagner A, Tobimatsu Y, Goeminne G, Phillips L, Flint H, Steward D, Torr K, Donaldson L, Boerjan W, Ralph J.** 2013. Suppression of *CCR* impacts metabolite profile and cell wall composition in *Pinus radiata* tracheary elements. *Plant Molecular Biology* **81**, 105-117.

**Weng JK, Chapple C.** 2010. The origin and evolution of lignin biosynthesis. *New Phytologist* **187**, 273-285.

**Weng JK, Mo HP, Chapple C.** 2010. Over-expression of *F5H* in *COMT*-deficient *Arabidopsis* leads to enrichment of an unusual lignin and disruption of pollen wall formation. *The Plant Journal* **64**, 898-911.

**Xue JS, Luo DX, Xu DY, Zeng MH, Cui XF, Li LG, Huang H.** 2015. *CCR1*, an enzyme required for lignin biosynthesis in *Arabidopsis*, mediates cell proliferation exit for leaf development. *The Plant Journal* **83**, 375-387.

**Yosef E, Ben-Ghedalia D.** 1999. Changes in thioacidolysis products of lignin

in wheat straw as affected by SO<sub>2</sub> treatment and passage through the gastro-intestine of sheep. *Animal Feed Science and Technology* **80**, 55-65.

**Zhang GP, Chen JX, Bull DA.** 2001. The effects of timing of N application and plant growth regulators on morphogenesis and yield formation in wheat. *Plant Growth Regulation* **35**, 239-245.

**Zhang K, Lu K, Qu CM, Liang Y, Wang R, Chai YR, Li JN.** 2013. Gene silencing of *BnTT10* family genes causes retarded pigmentation and lignin reduction in the seed coat of *Brassica napus*. *Plos One* **8**(4):e61247.

**Zhao J, Wang J, An L, Doerge R, Chen ZJ, Grau CR, Meng J, Osborn TC.** 2007a. Analysis of gene expression profiles in response to *Sclerotinia sclerotiorum* in *Brassica napus*. *Planta* **227**, 13-24.

**Zhao Q, Tobimatsu Y, Zhou R, Pattathil S, Gallego-Giraldo L, Fu C, Jackson LA, Hahn MG, Kim H, Chen F, Ralph J, Dixon RA.** 2013. Loss of function of cinnamyl alcohol dehydrogenase 1 leads to unconventional lignin and a temperature-sensitive growth defect in *Medicago truncatula*. *Proceedings of the National Academy of Sciences of the United States of America* **110**, 13660-13665.

**Zhao XY, Yu XH, Foo E, Symons GM, Lopez J, Bendehakkalu KT, Xiang J, Weller JL, Liu XM, Reid JB, Lin CT.** 2007b. A study of gibberellin homeostasis and cryptochrome-mediated blue light inhibition of hypocotyl elongation. *Plant Physiology* **145**, 106-118.

**Zhou R, Jackson L, Shadle G, Nakashima J, Temple S, Chen F, Dixon RA.** 2010. Distinct cinnamoyl CoA reductases involved in parallel routes to lignin in *Medicago truncatula*. *Proceedings of the National Academy of Sciences of the United States of America* **107**, 17803-17808.

## Figure legends

**Fig. 1.** Phylogenetic analysis of CCR refseq\_proteins from representative whole-genome-sequenced Malvids species including *B. napus*, *B. rapa* and *B. oleracea*.

Latin name, refseq\_protein name and accession number are provided for each sequence. Names of cloned genes in this study are given after the accession numbers. Vertical bars on the right indicate corresponding order or order-family names.

**Fig. 2.** Different phenotypic modifications in *BnCCR1-2ox* and *BnCCR2-4ox* plants.

(A-M) Plant phenotypes of different stages. Vegetative stage ([A-D]), middle-later bolting stage ([E-G]), flowering stage ([H-J]), harvest stage ([K-M]).

Bending phenomenon of the upper stem of *BnCCR1-2ox* plants at late bolting stage (F) will disappear after flowering (I).

(N, O) root system at mature stage.

(P, Q) Root system of one-week old seedlings, and the investigated values with statistic significance. Data represent means  $\pm$  SD of at least 5 biological replicates. Asterisks indicate that means differed significantly from WT values (\*P < 0.05; \*\*P < 0.01, Student's t tests).

(R) Siliques at mature stage, indicating the wider siliques of *BnCCR1-2ox* and *BnCCR2-4ox* compared with WT. Bar = 1cm.

**Fig. 3.** Yellow seeds from T3 plants of *BnCCR1-2ox* and *BnCCR2-4ox* in contrast with black seeds from WT plants.

(A, B) seeds and seed coat cross-sections, highlighting the yellow-seed trait caused by seed color lightening by CCR overexpression. Bar = 50 $\mu$ m.

(C) extractable insoluble condensed tannins from seed coat, showing deeper color of *BnCCR2-4ox* as compared with *BnCCR1-2ox* and WT which implies easier extraction.

(D) 1000 seeds weight; (D) Seeds R value (higher value means deeper yellow color of the seeds coat); (F) Glucosinolates content ( $\mu$ mol/g); (G) Insoluble condensed tannins content of the seed coat. Data represent means  $\pm$  SD of at least three biological replicates. Different letters behind the SD indicate statistically significant differences (one-way ANOVA, P < 0.05, Duncan's test).

**Fig. 4.** *BnCCR1-2ox* and *BnCCR2-4ox* plants show differently fortified lignification patterns in various organs.

(A-C) Whole cross frozen stem-sections at early flowering stage ([A, B]), and whole cross free hand stem-section at harvesting stage (C). (A) Mäule staining; (B, C) phloroglucinol-HCl staining. Bar = 2mm.

(D, E) Cross-sections at mature stage of roots with more interfascicular fibers (D) and less interfascicular fibers (E), stained with phloroglucinol-HCl method.

Bar = 500 $\mu$ m.

(F-J) Cross-sections of different parts of the stem at different developing stages. Middle-lower part of the stem at early flowering stage using Mäule staining with different amplification folds ([F, G]). Middle-lower part of the stem at mature stage with phloroglucinol-HCl staining (H). Autofluorescence of the middle stem at early flowering stage under UV light with different amplification folds ([I] and [J]). if, interfascicular fiber; ph, phloem; pi, pith; xy, xylem. (F, I), bar = 200 $\mu$ m; (G), (H, J), bar = 80 $\mu$ m.

(K-N) Silique wall cross-sections at mature stage. Whole sections (K); Local sections ([I-N]). (K-L) Phloroglucinol-HCl staining; (M, N) Autofluorescence viewed under UV light. (K), bar = 500 $\mu$ m; (L) and (M), bar = 100 $\mu$ m; (N), bar = 50 $\mu$ m.

(O-Q) Cross sections of the middle petiole with different methods. The whole cross-sections without any treatment (I); The vascular bundle with Mäule staining (P); The autofluorescence of the vascular bundle under UV light (Q); bar = 50 $\mu$ m. (I), bar = 1000 $\mu$ m; (P), bar = 100 $\mu$ m; (Q), bar = 50 $\mu$ m.

(R-T) Total lignin content analysis of stems (r), roots (s) and seed coats (t) was carried out by AcBr method. CWR, cell wall residue. Values are means  $\pm$  SD of at least three biological replicates. Different letters above the bars indicate statistically significant differences (one-way ANOVA,  $P < 0.05$ , Duncan's test).

(U-X) Lignin monomer compositions of stems (U) and roots (V) were measured by thioacidolysis method. S/G ratios in stems and roots are displayed in (W) and (V), respectively. Values are means  $\pm$  SD of at least three biological replicates. Different letters and values above the bars indicate statistically significant differences (one-way ANOVA,  $P < 0.05$ , Tukey's test) and respective percentage of the corresponding lignin monomers.

**Fig. 5.** Secondary metabolites are distinctly modified in stems of *BnCCR1-2ox* and *BnCCR2-4ox* plants.

(A) Major soluble metabolites related to lignin pathway and its derivative

pathways in the stems of ox1-5 and ox2-16 and WT, and see detail information in [Supplementary Table S5](#).

(B) Major soluble metabolites related to flavonoid pathway in the seeds of ox1-5 and ox2-16 and WT, and see detail information in [Supplementary Table S6](#). DP, degree of polymerization of the epicatechin unit.

(C) Major soluble metabolites related to glucosinolate pathway in the leaves of ox1-5 and ox2-16 and WT, and see detail information in [Supplementary Table S5](#).

**Fig. 6.** Gene expression patterns of lignin, flavonoid and glucosinolate pathways are tremendously and differentially influenced in *BnCCR1-2ox* and *BnCCR2-4ox* plants.

(A) Transcript levels of the genes related to lignin biosynthesis in stems.

(B) Transcript levels of the genes related to flavonoid biosynthesis in seeds.

(C) Transcript levels of the genes related to glucosinolate biosynthesis in leaves. The MYB29, CYP79F1 and GSL have no expression in WT, hence their expression level in *BnCCRox* is set relative to zero. The expression levels of other genes are set relative to WT. The yellow frame marks the genes involved in the synthesis of aliphatic glucosinolates. The red frame marks the genes involved in the synthesis of indole glucosinolates.

**Fig. 7.** *BnCCR1* and *BnCCR2* play different roles in phenylpropanoid pathway. The metabolic flux shifts in *BnCCR1-2ox* and *BnCCR2-4ox* plants are displayed in this map. The main route, which is conserved in angiosperms, is marked with the big background arrows (the general phenylpropanoid pathway is marked in light blue, while lignin-specific pathway is marked in brown). The blue arrows and names represent flux enhancement related to *BnCCR1-2ox*. Metabolites accumulation and related gene expression are increased in the stem of *BnCCR1-2ox*, indicating that overexpression of *BnCCR1* subfamily will significantly promote the biosynthesis of G- and H-lignin units. The purple arrows and names represent flux enhancement related to *BnCCR2-4ox*.

Metabolites accumulation and related genes expression are increased in the stem of *BnCCR2-4ox*, indicating that overexpression of *BnCCR2* subfamily will significantly promote the biosynthesis of S-lignin unit. The metabolites and the enzymes downregulated in both *BnCCR1-2ox* and *BnCCR2-4ox* plants are marked in green, whereas those with upregulation are in red. Unexpectedly, glucosinolates deposition and pathway gene expression are significantly and differently remodeled in *BnCCR1-2ox* and *BnCCR2-4ox* plants. Dashed arrows represent unknown or unauthenticated routes. Arrows with a question mark are suggested pathways in this study. Two successive arrows represent two or more metabolic conversions.

The enzymes and their abbreviations are as follows: ANR, anthocyanidin reductase; ANS, anthocyanidin synthase; CAD, cinnamyl alcohol dehydrogenase; 4CL, 4-coumarate:CoA ligase; C3H, *p*-coumarate 3-hydroxylase; C4H, cinnamate 4-hydroxylase; CCoAOMT, caffeoyl-CoA O-methyltransferase; CCR, cinnamoyl-CoA reductase; CHI, chalcone isomerase; CHS, chalcone synthase; COMT, caffeic acid O-methyltransferase; CSE, caffeoyl shikimate esterase; DFR, dihydroflavonol 4-reductase; F3H, flavanone 3-hydroxylase; F3'H, flavonoid 3'-hydroxylase; F5H, ferulate 5-hydroxylase; FLS, flavonol synthase; HCALDH, hydroxycinnamaldehyde dehydrogenase; HCT, hydroxycinnamoyl-CoA:shikimate/quinic hydroxycinnamoyl transferase; LAC, laccase; LDOX, leucoanthocyanidin dioxygenase; Med: mediator; PAL, phenylalanine ammonia-lyase; PER, peroxidase; SGT, sinapate 1-glucosyltransferase; SMT, sinapoylglucose:malate sinapoyltransferase; SST, sinapoylglucose:sinapoylglucose sinapoylglucosyltransferase; UGT, uridine diphosphate glycosyltransferase.

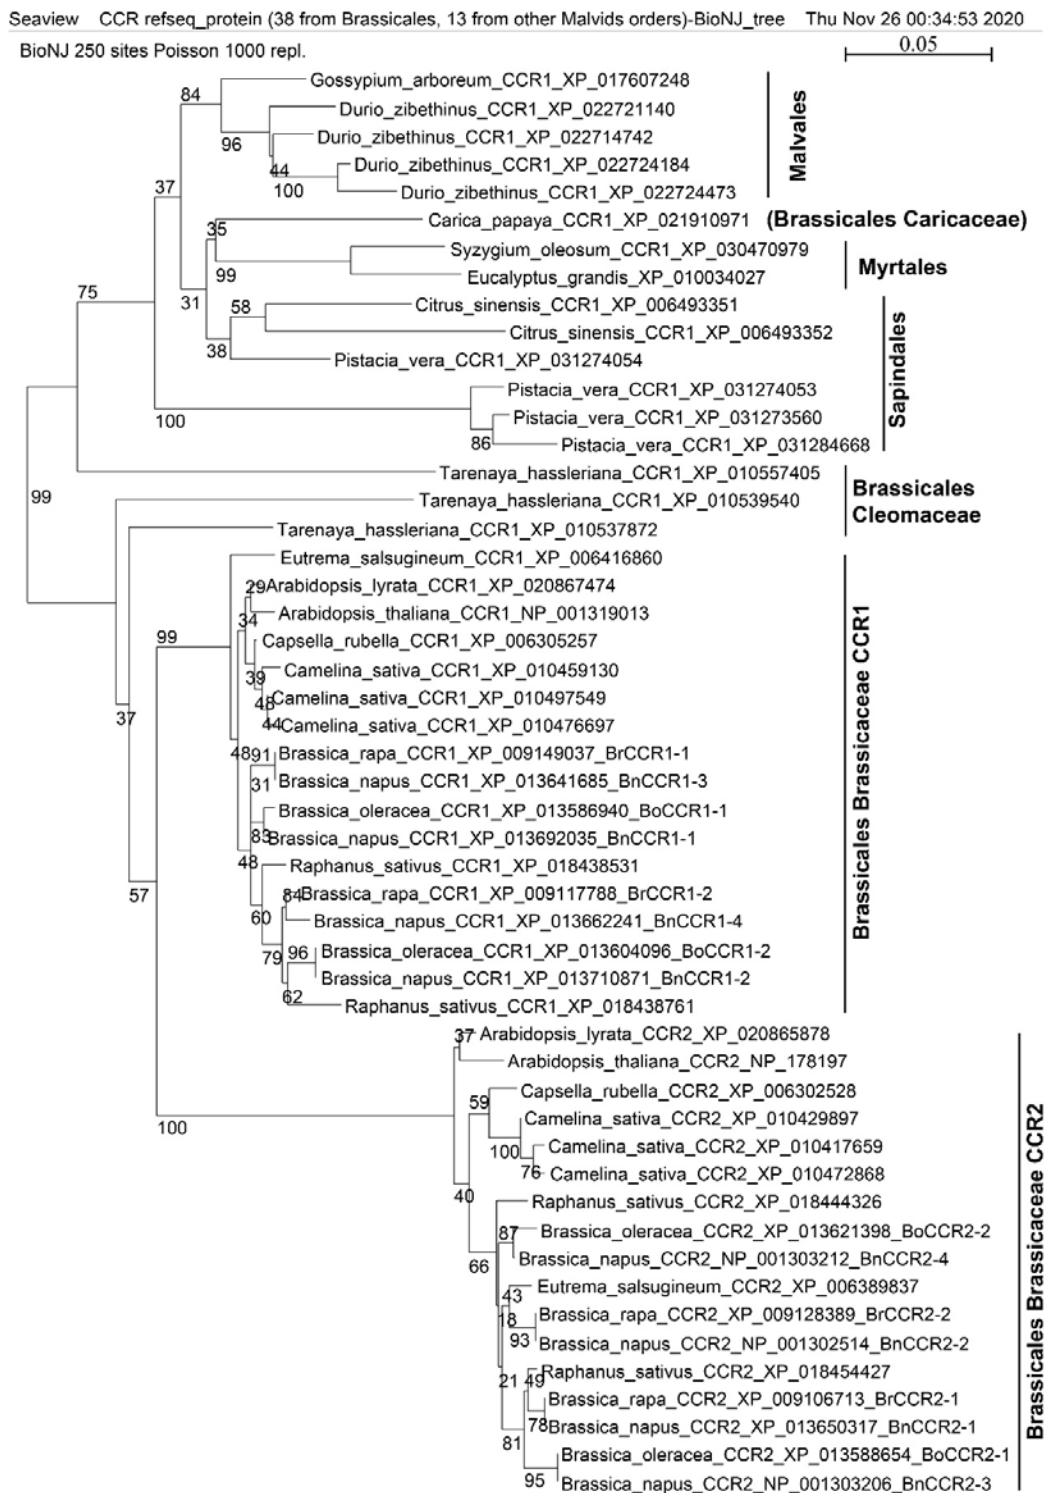

**Figure 1** Phylogenetic analysis of CCR refseq\_proteins from representative whole-genome-sequenced Malvids species including *B. napus*, *B. rapa* and *B. oleracea*.

Latin name, refseq\_protein name and accession number are provided for each sequence. Names of cloned genes in this study are given after the accession numbers. Vertical bars on the right indicate corresponding order or order-family names.

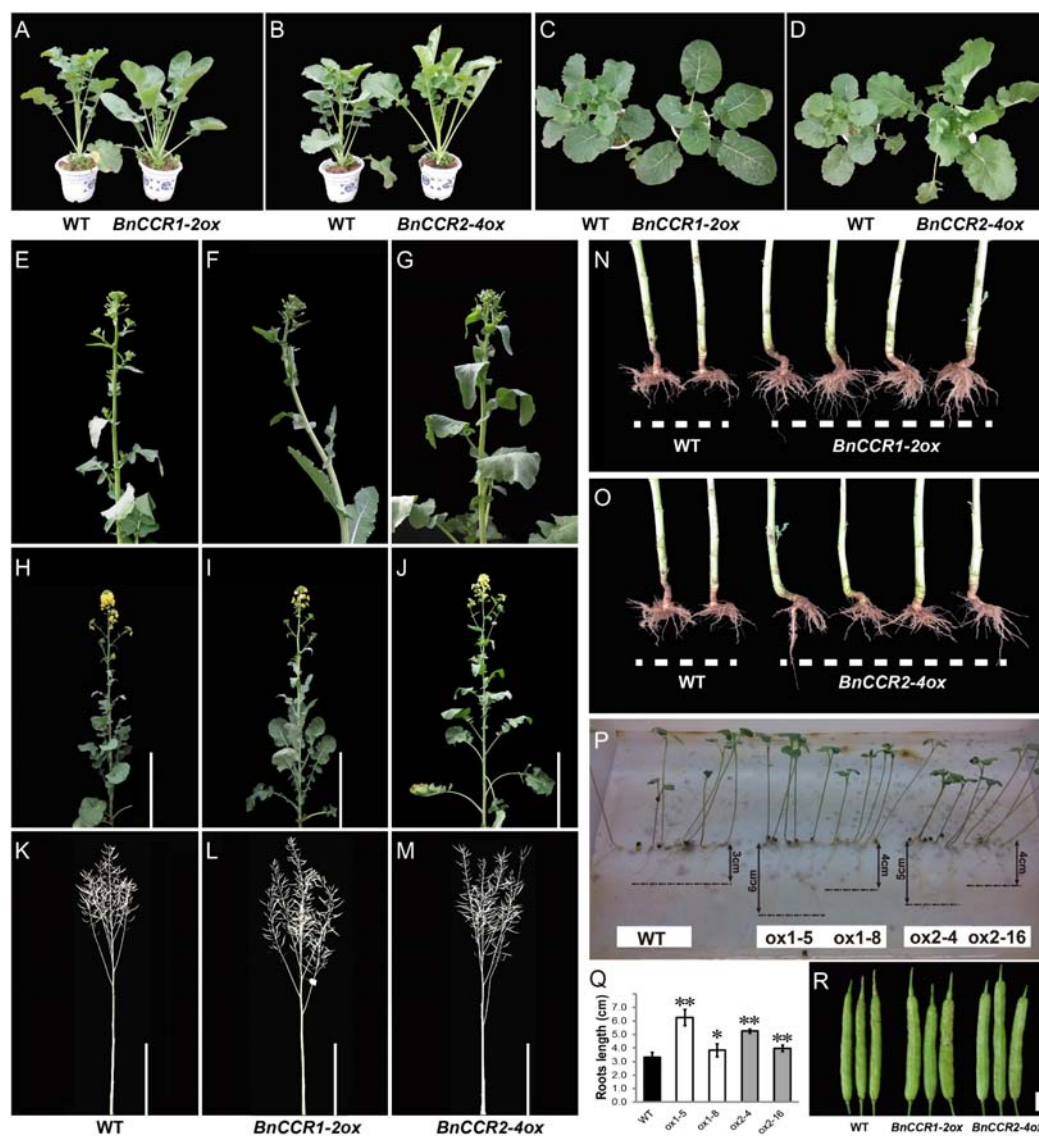

**Figure 2** Different phenotypic modifications in *BnCCR1-2ox* and *BnCCR2-4ox* plants.

(A-M) Plant phenotypes of different stages. Vegetative stage ([A-D]), middle-late bolting stage ([E-G]), flowering stage ([H-J]), harvest stage ([K-M]). Bending phenomenon of the upper stem of *BnCCR1-2ox* plants at late bolting stage (F) will disappear after flowering (I).

(N, O) root system at mature stage.

(P, Q) Root system of one-week old seedlings, and the investigated values with statistic significance.

Data represent means  $\pm$  SD of at least 5 biological replicates. Asterisks indicate that means differed significantly from WT values (\*P < 0.05; \*\*P < 0.01, Student's *t* tests).

(R) Siliques at mature stage, indicating the wider siliques of *BnCCR1-2ox* and *BnCCR2-4ox* compared with WT. Bar = 1cm.



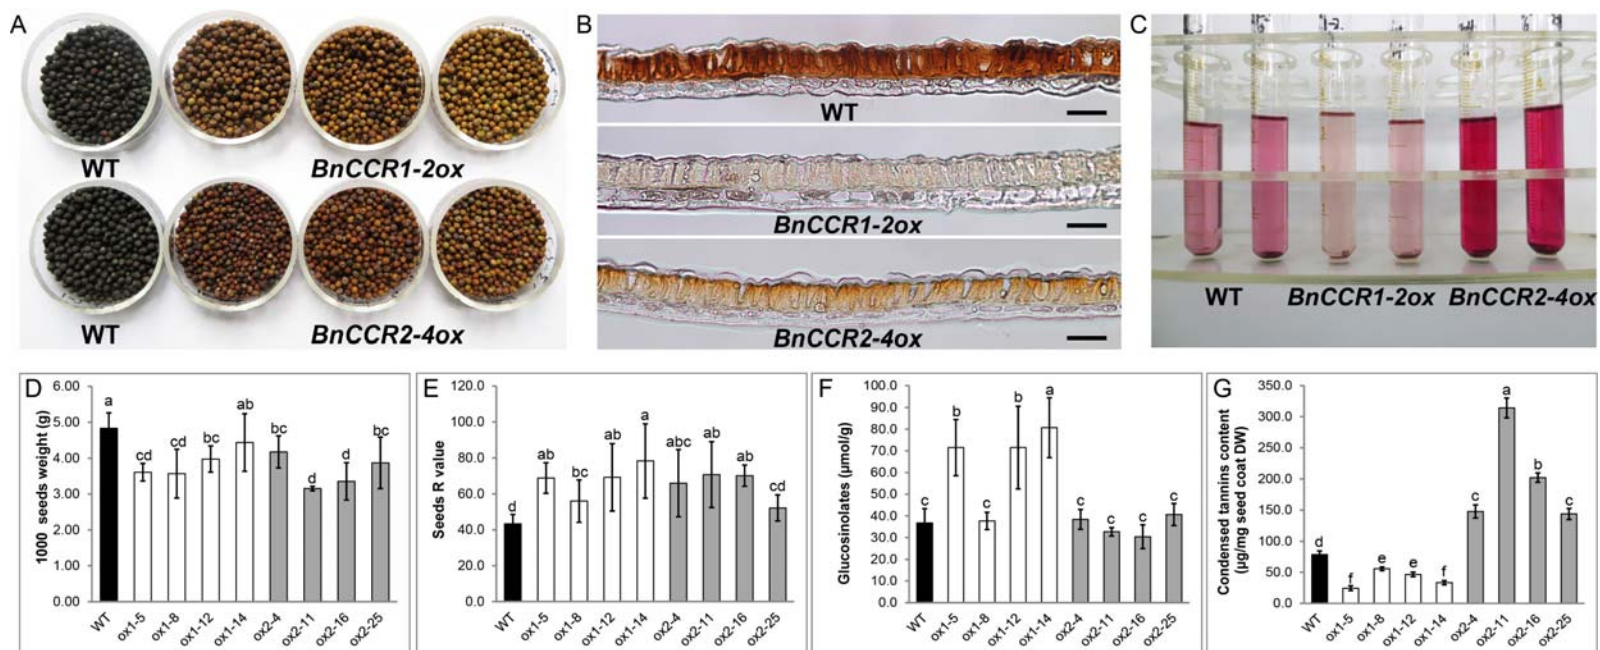

**Figure 3** Yellow seeds from T3 plants of *BnCCR1-2ox* and *BnCCR2-4ox* in contrast with black seeds from WT plants.

(A, B) seeds and seed coat cross-sections, highlighting the yellow-seed trait caused by seed color lightening by *CCR* overexpression. Bar = 50μm.

(C) extractable insoluble condensed tannins from seed coat, showing deeper color of *BnCCR2-4ox* as compared with *BnCCR1-2ox* and WT which implies easier extraction.

(D) 1000 seeds weight; (D) Seeds R value (higher value means deeper yellow color of the seeds coat); (F) Glucosinolates content (μmol/g); (G) Insoluble condensed tannins content of the seed coat. Data represent means ± SD of at least three biological replicates. Different letters behind the SD indicate statistically significant differences (one-way ANOVA,  $P < 0.05$ , Duncan's test).

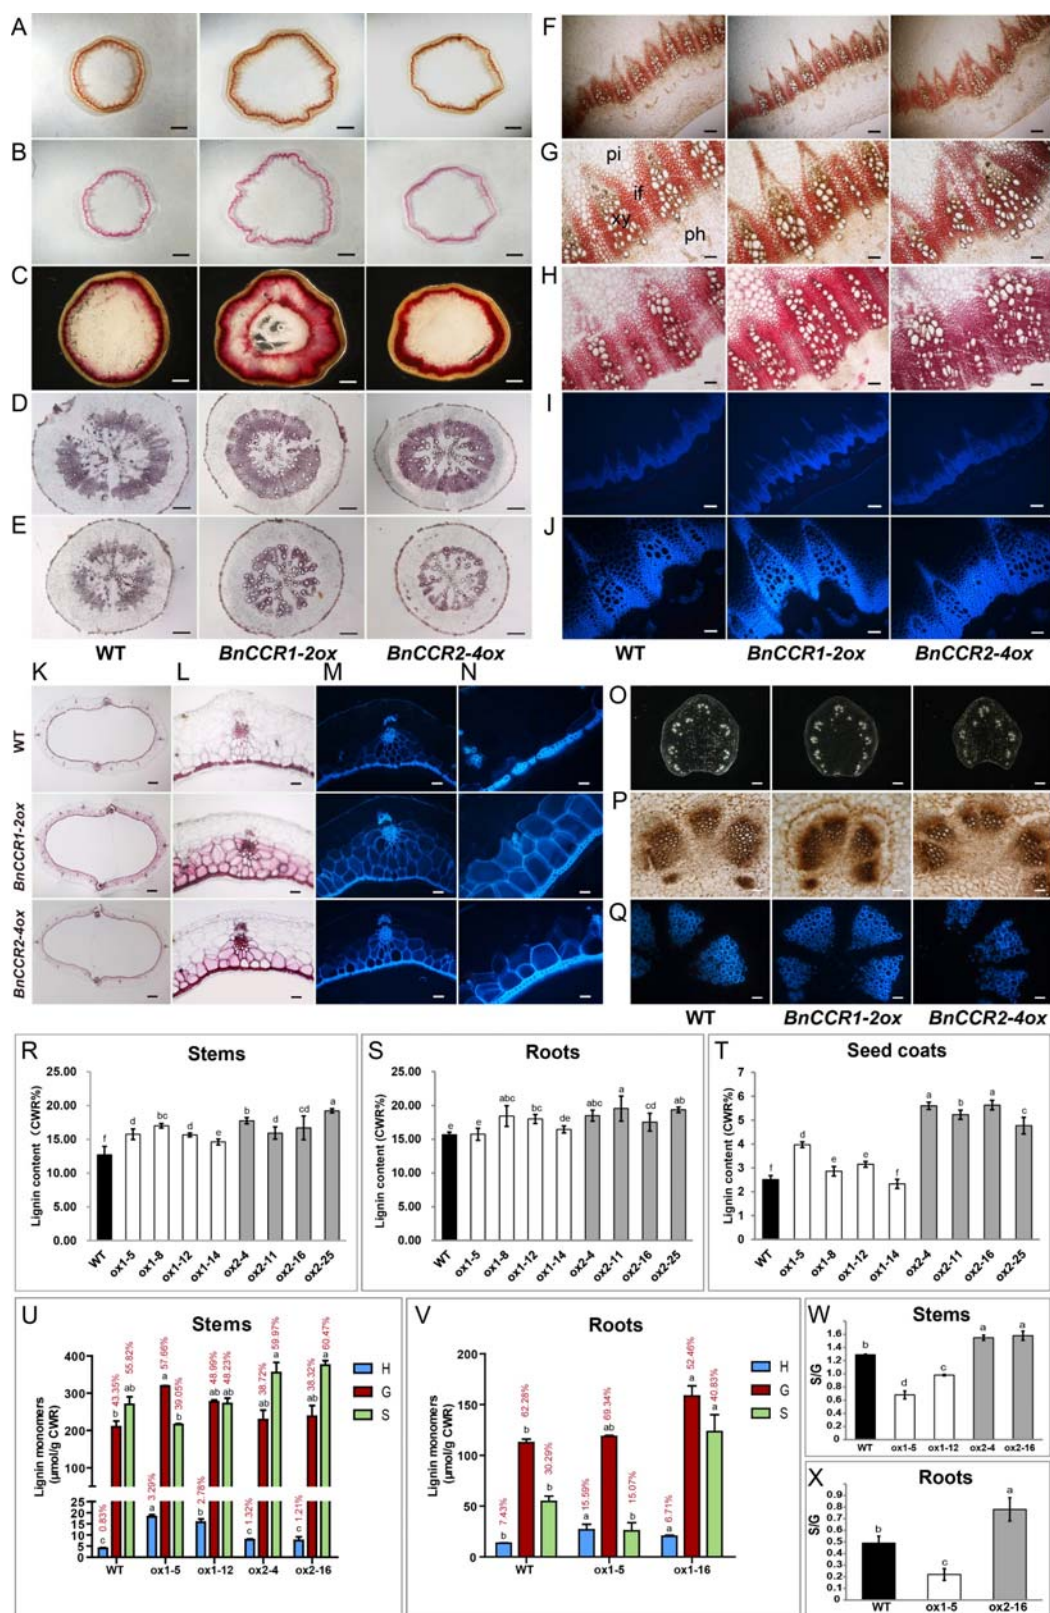

stem-section at harvesting stage (C). (A) Mäule staining; (B, C) phloroglucinol-HCl staining. Bar = 2mm.

(D, E) Cross-sections at mature stage of roots with more interfascicular fibers (D) and less interfascicular fibers (E), stained with phloroglucinol-HCl method. Bar = 500 $\mu$ m.

(F-J) Cross-sections of different parts of the stem at different developing stages. Middle-lower part of the stem at early flowering stage using Mäule staining with different amplification folds ([F, G]). Middle-lower part of the stem at mature stage with phloroglucinol-HCl staining (H). Autofluorescence of the middle stem at early flowering stage under UV light with different amplification folds ([I] and [J]). if, interfascicular fiber; ph, phloem; pi, pith; xy, xylem. (F, I), bar = 200 $\mu$ m; (G), (H, J), bar = 80 $\mu$ m.

(K-N) Silique wall cross-sections at mature stage. Whole sections (K); Local sections ([I-N]). (K-L) Phloroglucinol-HCl staining; (M, N) Autofluorescence viewed under UV light. (K), bar = 500 $\mu$ m; (L) and (M), bar = 100 $\mu$ m; (N), bar = 50 $\mu$ m.

(O-Q) Cross sections of the middle petiole with different methods. The whole cross-sections without any treatment (I); The vascular bundle with Mäule staining (P); The autofluorescence of the vascular bundle under UV light (Q); bar = 50 $\mu$ m. (I), bar = 1000 $\mu$ m; (P), bar = 100 $\mu$ m; (Q), bar = 50 $\mu$ m.

(R-T) Total lignin content analysis of stems (r), roots (s) and seed coats (t) was carried out by AcBr method. CWR, cell wall residue. Values are means  $\pm$  SD of at least three biological replicates. Different letters above the bars indicate statistically significant differences (one-way ANOVA,  $P < 0.05$ , Duncan's test).

(U-X) Lignin monomer compositions of stems (U) and roots (V) were measured by thioacidolysis method. S/G ratios in stems and roots are displayed in (W) and (V), respectively. Values are means  $\pm$  SD of at least three biological replicates. Different letters and values above the bars indicate statistically significant differences (one-way ANOVA,  $P < 0.05$ , Tukey's test) and respective percentage of the corresponding lignin monomers.

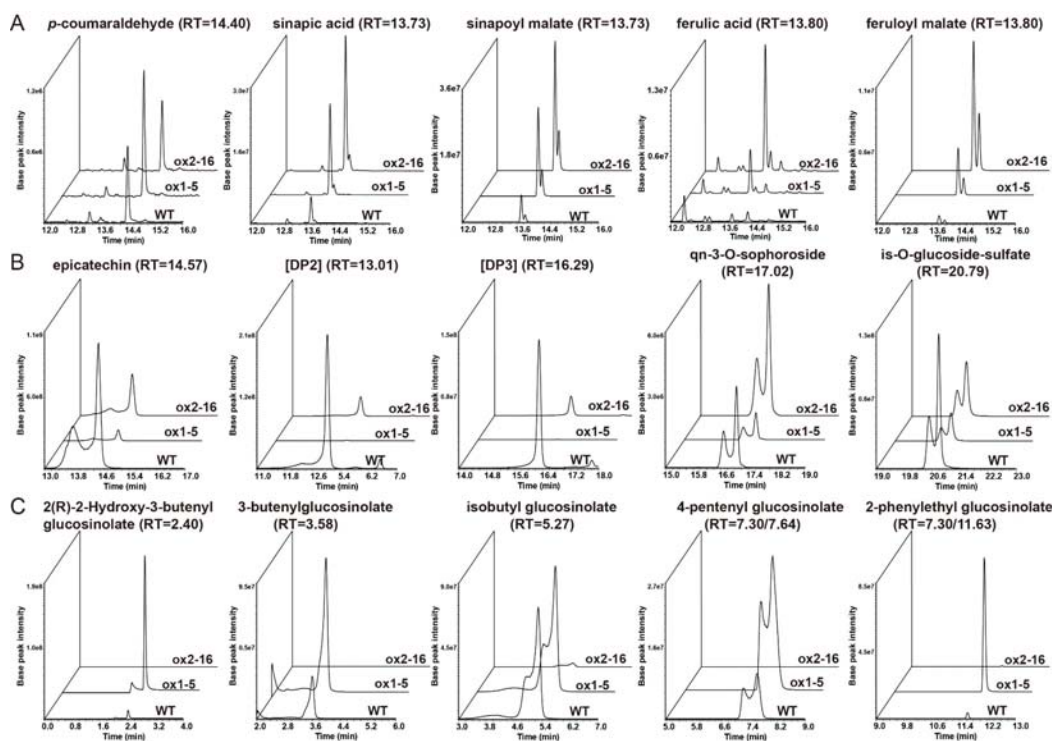

**Figure 5** Secondary metabolites are distinctly modified in stems of *BnCCR1-2ox* and *BnCCR2-4ox* plants.

Secondary metabolites were determined by UPLC-HESI-MS/MS.

(A) Major soluble metabolites related to lignin pathway and its derivative pathways in the stems of ox1-5 and ox2-16 and WT, and see detail information in [Supplementary Table S5](#).

(B) Major soluble metabolites related to flavonoid pathway in the seeds of ox1-5 and ox2-16 and WT, and see detail information in [Supplementary Table S6](#). DP, degree of polymerization of the epicatechin unit.

(C) Major soluble metabolites related to glucosinolate pathway in the leaves of ox1-5 and ox2-16 and WT, and see detail information in [Supplementary Table S5](#).

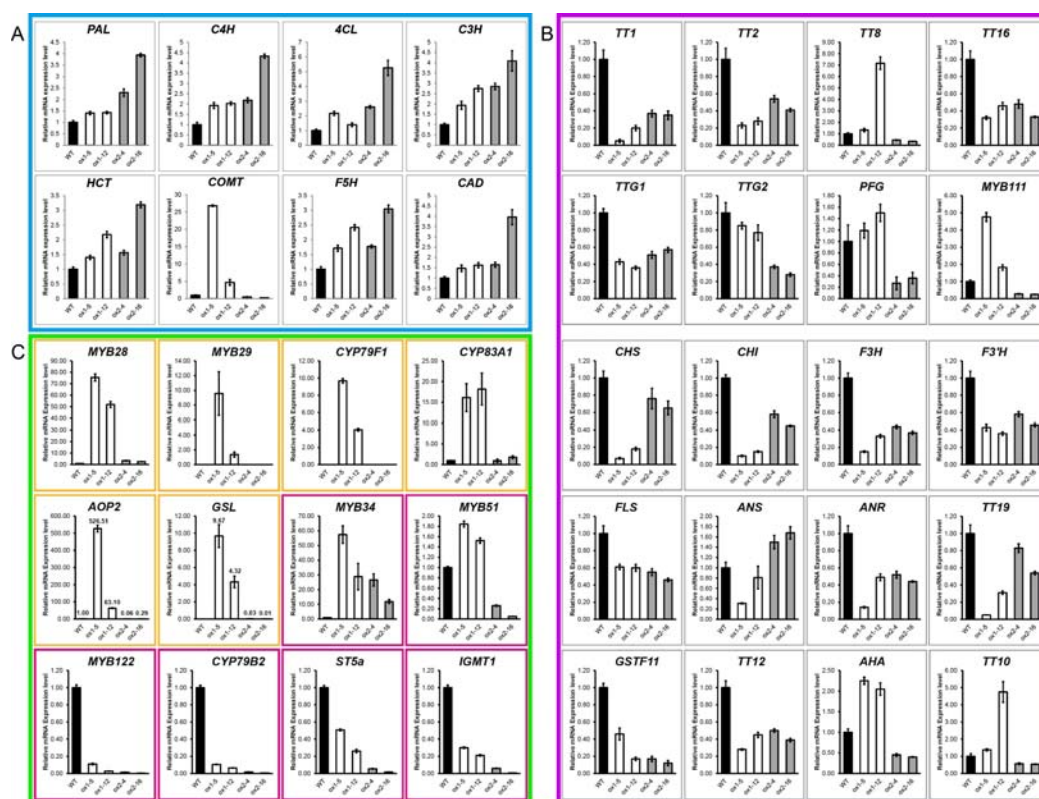

**Figure 6** Gene expression patterns of lignin, flavonoid and glucosinolate pathways are tremendously and differentially influenced in *BnCCR1-2ox* and *BnCCR2-4ox* plants.

(A) Transcript levels of the genes related to lignin biosynthesis in stems.

(B) Transcript levels of the genes related to flavonoid biosynthesis in seeds.

(C) Transcript levels of the genes related to glucosinolate biosynthesis in leaves. The *MYB29*, *CYP79F1* and *GSL* have no expression in WT, hence their expression level in *BnCCRox* is set relative to zero. The expression levels of other genes are set relative to WT. The yellow frame marks the genes involved in the synthesis of aliphatic glucosinolates. The red frame marks the genes involved in the synthesis of indole glucosinolates.

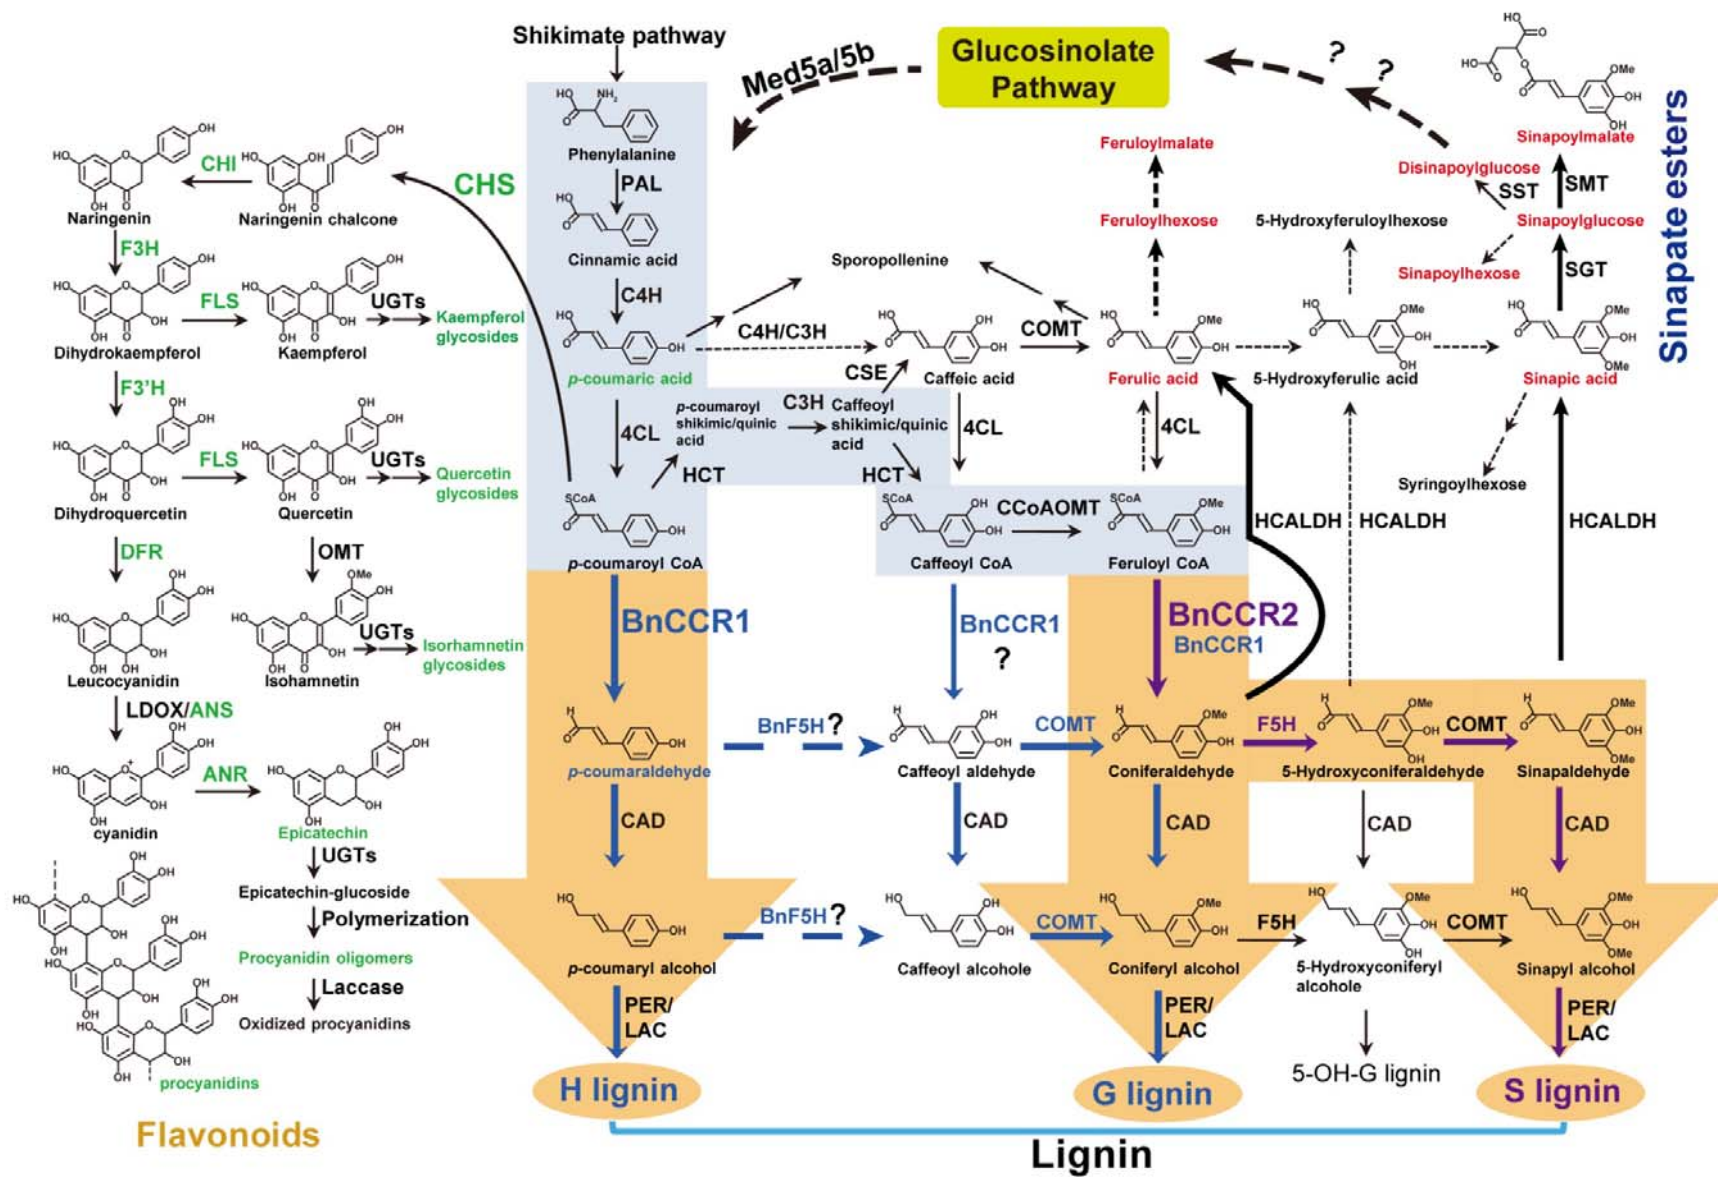

**Figure 7** BnCCR1 and BnCCR2 play different roles in phenylpropanoid pathway.

The metabolic flux shifts in *BnCCR1-2ox* and *BnCCR2-4ox* plants are displayed in this map. The main route, which is conserved in angiosperms, is marked with the big background arrows (the general phenylpropanoid pathway is marked in light blue, while lignin-specific pathway is marked in brown). The blue arrows and names represent flux enhancement related to *BnCCR1-2ox*. Metabolites accumulation and related gene expression are increased in the stem of *BnCCR1-2ox*, indicating that overexpression of *BnCCR1* subfamily will significantly promote the biosynthesis of G- and H-lignin units. The purple arrows and names represent flux enhancement related to *BnCCR2-4ox*. Metabolites accumulation and related genes expression are increased in the stem of *BnCCR2-4ox*, indicating that overexpression of *BnCCR2* subfamily will significantly promote the biosynthesis of S lignin unit. The metabolites and the enzymes downregulated in both *BnCCR1-2ox* and *BnCCR2-4ox* plants are marked in green, whereas those with upregulation are in red. Unexpectedly, glucosinolates deposition and pathway gene expression are significantly and differently remodeled in *BnCCR1-2ox* and *BnCCR2-4ox* plants. Dashed arrows represent unknown or unauthenticated routes. Arrows with a question mark are suggested pathways in this study. Two successive arrows represent two or more metabolic conversions.

The enzymes and their abbreviations are as follows: ANR, anthocyanidin reductase; ANS, anthocyanidin synthase; CAD, cinnamyl alcohol dehydrogenase; 4CL, 4-coumarate:CoA ligase; C3H, *p*-coumarate 3-hydroxylase; C4H, cinnamate 4-hydroxylase; CCoAOMT, caffeoyl-CoA O-methyltransferase; CCR, cinnamoyl-CoA reductase; CHI, chalcone isomerase; CHS, chalcone synthase; COMT, caffeic acid O-methyltransferase; CSE, caffeoyl shikimate esterase; DFR, dihydroflavonol 4-reductase; F3H, flavanone 3-hydroxylase; F3'H, flavonoid 3'-hydroxylase; F5H, ferulate 5-hydroxylase; FLS, flavonol synthase; HCALDH, hydroxycinnamaldehyde dehydrogenase; HCT, hydroxycinnamoyl-CoA:shikimate/quinic hydroxycinnamoyl transferase; LAC, laccase; LDOX, leucoanthocyanidin dioxygenase; Med: mediator; PAL, phenylalanine ammonia-lyase; PER, peroxidase; SGT, sinapate 1-glucosyltransferase; SMT, sinapoylglucose:malate sinapoyltransferase; SST, sinapoylglucose:sinapoylglucose sinapoylglucosyltransferase; UGT, uridine diphosphate glycosyltransferase.
